# Supplementary material
Source: publisher figshare collection journal article supplement (https://gsajournals.figshare.com/articles/dataset/_/14195846)
Supplement: Supplementary file 1 [file 1]

## Sheet: Sheet1
Table S5. Genome-wide list of non-overlapping convergent gene pairs and intergene distances.
Gene on Watson Strand	Gene on Crick Strand	Base Pairs Apart	Coordinates of Gene on Watson Strand	Coordinates of Gene on Crick Strand	Chromosome
YAL068W-A	PAU8	1015	538-792	1807-2169	chrI
YAL067W-A	SEO1	4528	2480-2707	7235-9016	chrI
YAL066W	YAL065C	1166	10091-10399	11565-11951	chrI
YAL064W-B	TDA8	937	12046-12426	13363-13743	chrI
YAL064W	YAL063C-A	545	21566-21850	22395-22685	chrI
BDH1	YAL059C-A	193	35155-36303	36496-36918	chrI
PEX22	ACS1	162	42177-42719	42881-45022	chrI
OAF1	AIM2	148	48564-51707	51855-52595	chrI
YAL047W-A	SPC72	76	54584-54913	54989-56857	chrI
BOL1	GCV3	100	57518-57850	57950-58462	chrI
CDC24	CLN3	374	62840-65404	65778-67520	chrI
YAL037W	RBG1	220	74020-74823	75043-76152	chrI
FUN12	YAL034C-B	54	76427-79435	79489-79842	chrI
MTW1	FUN19	123	79718-80587	80710-81951	chrI
POP5	PRP45	108	82706-83227	83335-84474	chrI
SNC1	MYO4	103	87286-87752	87855-92270	chrI
FUN30	LDS1	250	114919-118314	118564-119541	chrI
PSK1	YAL016C-B	12	120225-124295	124307-124492	chrI
TPD3	NTG1	117	124879-126786	126903-128102	chrI
SWC3	MDM10	108	132199-134076	134184-135665	chrI
FUN14	ERP2	188	136914-137510	137698-138345	chrI
VPS8	TFC3	63	143707-147531	147594-151166	chrI
NUP60	ERP1	189	152257-153876	154065-154724	chrI
SWD1	RFA1	469	155005-156285	156754-158619	chrI
SEN34	BUD14	6949	158966-159793	166742-168871	chrI
ADE1	KIN3	101	169375-170295	170396-171703	chrI
YAR019W-A	PAU7	1526	174998-175330	176856-177023	chrI
YAT1	YAR035C-A	81	190193-192256	192337-192417	chrI
SWH1	YAR047C	5282	192619-196185	201467-201787	chrI
YAR053W	YAR060C	8494	208367-208663	217157-217492	chrI
YAR068W	YAR069C	1120	222406-222891	224011-224304	chrI
YBL113W-A	YBL112C	1454	646-1128	2582-2899	chrII
YBL109W	PAU9	1480	5790-6125	7605-7733	chrII
YBL107W-A	MIX23	589	9268-9372	9961-10551	chrII
SFT2	ECM21	201	24098-24745	24946-28299	chrII
YBL100W-C	YBL100C	8443	28427-28546	36989-37303	chrII
BRN1	YBL096C	79	40831-43095	43174-43482	chrII
RPL32	SCS22	195	45645-46370	46565-47180	chrII
AVT5	TEL1	66	49574-50953	51019-59382	chrII
BOI1	CDC27	351	63876-66818	67169-69445	chrII
YBL081W	PET112	98	71866-72972	73070-74695	chrII
NUP170	ATG8	611	75259-79767	80378-80731	chrII
YBL073W	RPS8A	566	87646-87957	88523-89440	chrII
PRS4	UBP13	245	92414-93394	93639-95882	chrII
YBL065W	PRX1	64	99963-100307	100371-101156	chrII
YEL1	CMC2	130	107932-109995	110125-110539	chrII
SHP1	PTH2	93	111437-112708	112801-113427	chrII
PTC3	YBL055C	405	113762-115168	115573-116829	chrII
RRT1	EDE1	285	127299-127610	127895-132040	chrII
PSY4	COR1	394	132424-133749	134143-135516	chrII
ECM13	FUI1	880	136688-137461	138341-140260	chrII
PRE7	ERD2	140	141247-141972	142112-142868	chrII
MIN6	URA7	417	143393-143572	143989-145728	chrII
APL3	YBL036C	161	147209-150286	150447-151220	chrII
SHE1	PET9	326	161699-162715	163041-163997	chrII
YBL029W	YBL028C	254	166134-167264	167518-167838	chrII
NCL1	MCM2	332	172534-174588	174920-177526	chrII
APN2	POP8	83	184353-185915	185998-186474	chrII
ACH1	RRN6	3362	194122-195702	199064-201748	chrII
FMT1	YBL012C	145	202056-203261	203406-203807	chrII
SCT1	LAA2	290	203538-205817	206107-206949	chrII
HIR1	SLA1	457	209653-212175	212632-216366	chrII
UTP20	HTA2	277	227636-235117	235394-235792	chrII
HTB2	ECM15	266	236492-236887	237153-237467	chrII
COQ1	GPI18	136	242809-244230	244366-245667	chrII
UGA2	DSF2	303	247010-248503	248806-251016	chrII
HHT1	IPP1	371	256331-256741	257112-257975	chrII
YBR016W	KAP104	314	270247-270633	270947-273703	chrII
POA1	CHS3	157	283738-284271	284428-287925	chrII
SCO2	OLA1	331	289445-290350	290681-291865	chrII
EDS1	HMT1	227	301944-304703	304930-305976	chrII
FAT1	CST26	141	318266-320275	320416-321609	chrII
RPS11B	REB1	574	332831-333812	334386-336818	chrII
YBR051W	RFS1	382	337988-338338	338720-339352	chrII
YRO2	PRP6	467	343101-344135	344602-347301	chrII
YBR064W	ECM2	393	367763-368191	368584-369678	chrII
HSP26	YBR072C-A	186	382030-382674	382860-383021	chrII
ECM8	YBR076C-A	60	390227-391291	391351-391617	chrII
ECM33	RPG1	641	393123-394742	395383-398277	chrII
MIS1	RPL19A	205	411054-413981	414186-415261	chrII
AAC3	YBR085C-A	2001	415983-416906	418907-419164	chrII
RFC5	POL30	161	423765-424829	424990-425766	chrII
YBR089W	NHP6B	408	425183-425782	426190-426873	chrII
PBY1	RXT2	109	432036-434297	434406-435698	chrII
SIF2	YBR103C-A	4	447709-449316	449320-449463	chrII
YMC2	VID24	225	449667-450656	450881-451969	chrII
SND3	IML3	569	452658-453224	453793-454530	chrII
AIM3	CMD1	254	454822-457665	457919-458362	chrII
ALG1	YSA1	957	458872-460221	461178-461873	chrII
SUS1	CYC8	291	462139-462579	462870-465770	chrII
RAD16	LYS2	128	467248-469620	469748-473926	chrII
MUD1	CBP6	112	479338-480323	480435-480923	chrII
YBR124W	PTC4	333	486507-486866	487199-488380	chrII
YBR126W-B	VMA2	199	490927-491070	491269-492822	chrII
YBR137W	YBR138C	179	513044-513583	513762-515336	chrII
ATG42	IRA1	160	515664-517190	517350-526628	chrII
MAK5	SUP45	231	528317-530638	530869-532182	chrII
ARA1	TBS1	188	539987-541021	541209-544493	chrII
RIB7	RPB5	168	547460-548194	548362-549009	chrII
CNS1	SLI15	176	549771-550928	551104-553200	chrII
CSH1	TOS1	439	561634-562764	563203-564570	chrII
EXO5	ARL1	395	565723-567480	567875-568426	chrII
UBS1	TYR1	157	568852-569685	569842-571200	chrII
PEX32	SSE2	303	572371-573612	573915-575996	chrII
SEC66	SMY2	166	578364-578984	579150-581372	chrII
ECM31	EHT1	149	583720-584658	584807-586162	chrII
YBR178W	FZO1	102	586071-586445	586547-589114	chrII
DTR1	RPS6B	253	589741-591459	591712-592774	chrII
YBR184W	MBA1	189	597363-598934	599123-599959	chrII
GDT1	NTC20	209	602634-603476	603685-604107	chrII
RIM2	MED8	297	607652-608785	609082-609753	chrII
AIM4	MSI1	205	610038-610409	610614-611882	chrII
DER1	MIN7	282	623576-624211	624493-624696	chrII
COS111	LDH1	312	629168-631942	632254-633381	chrII
FTH1	DUR1%2C2	160	635146-636543	636703-642210	chrII
ERV15	AME1	180	645550-645978	646158-647132	chrII
HPC2	YBP1	259	653356-655317	655576-657600	chrII
ATG12	PYC2	315	657832-658392	658707-662249	chrII
YBR221W-A	PCS60	78	666538-666642	666720-668351	chrII
SLX1	ROT2	130	675313-676227	676357-679221	chrII
COQ21	SWC5	1617	680362-680562	682179-683090	chrII
DAD3	ARC40	177	684977-685261	685438-686592	chrII
VHC1	ABD1	120	686901-690263	690383-691693	chrII
PRP5	YBR238C	589	691969-694518	695107-697302	chrII
YBR242W	ALG7	61	704670-705386	705447-706793	chrII
GPX2	ISW1	134	707528-708016	708150-711539	chrII
RRT2	ENP1	250	711591-712754	713004-714455	chrII
SRB6	TRS20	101	723270-723635	723736-724263	chrII
MTC4	RCF3	78	724456-726540	726618-727074	chrII
POP4	SHG1	10	728885-729724	729734-730162	chrII
YBR259W	RGD1	186	730387-732453	732639-734639	chrII
SHM1	YPT10	34	736264-737736	737770-738369	chrII
MRPL37	SDH8	544	741299-741616	742160-742576	chrII
EFM2	HSM3	250	744852-746111	746361-747803	chrII
CHK1	RIF1	179	749594-751177	751356-757106	chrII
PAF1	SAF1	190	761257-762594	762784-764697	chrII
MRPL27	SSH1	263	768240-768680	768943-770415	chrII
YBR287W	APM3	158	776571-777854	778012-779463	chrII
BSD2	CTP1	117	782591-783556	783673-784572	chrII
PCA1	PHO89	299	792849-796499	796798-798522	chrII
MAL32	YBR300C	1495	805351-807105	808600-809097	chrII
PAU24	COS2	921	809057-809419	810340-811479	chrII
YCL076W	GEX1	4344	1392-2135	6479-8326	chrIII
VBA3	YCL068C	421	9706-11082	11503-12285	chrIII
YCL065W	CHA1	1679	13751-14119	15798-16880	chrIII
VAC17	MRC1	255	17290-18561	18816-22106	chrIII
ADF1	MIC10	107	23584-23925	24032-24325	chrIII
PRD1	PEX34	19	24768-26906	26925-27359	chrIII
SPB1	PBN1	169	31449-33974	34143-35393	chrIII
LRE1	APA1	220	35865-37616	37836-38801	chrIII
SPS22	POF1	105	42165-43556	43661-44437	chrIII
YCL046W	MGR1	148	46640-46963	47111-48364	chrIII
GID7	ATG22	59	52645-54882	54941-56527	chrIII
GFD2	GRX1	115	59026-60726	60841-61173	chrIII
LSB5	MXR2	54	61658-62722	62776-63282	chrIII
STE50	RRP7	194	63441-64481	64675-65568	chrIII
FUS1	HBN1	64	71803-73341	73405-73986	chrIII
LEU2	NFS1	359	91324-92418	92777-94270	chrIII
BUD3	YCL012C	126	96281-101191	101317-101788	chrIII
PGS1	YCL002C	138	109105-110670	110808-111675	chrIII
YCR001W	CDC10	1381	115685-115999	117380-118348	chrIII
MRPL32	YCP4	404	118620-119171	119575-120318	chrIII
SAT4	RVS161	464	128470-130281	130745-131542	chrIII
YCR016W	CWH43	267	143634-144506	144773-147634	chrIII
MAK32	PET18	84	152837-153928	154012-154659	chrIII
HTL1	HSP30	553	155320-155556	156109-157107	chrIII
ELO2	RRP43	199	190592-191635	191834-193018	chrIII
RBK1	PHO87	116	193297-194298	194414-197185	chrIII
YCR038W-A	MATALPHA2	128	199293-199418	199546-200178	chrIII
YCR045W-A	IMG1	813	208751-209101	209914-210423	chrIII
YCR047W-A	YCR049C	364	211301-211507	211871-212317	chrIII
THR4	CTR86	135	216697-218241	218376-220067	chrIII
YCR061W	YCR064C	637	225563-227458	228095-228505	chrIII
RAD18	SED4	162	231500-232963	233125-236322	chrIII
CPR4	IMG2	92	239055-240011	240103-240543	chrIII
SOL2	ERS1	123	246963-247910	248033-248815	chrIII
EGO2	FUB1	91	248975-249202	249293-250045	chrIII
TRX3	TUP1	350	259578-259961	260311-262452	chrIII
FIG2	YCR090C	52	267434-272263	272315-272863	chrIII
KIN82	MSH3	198	274404-276566	276764-279820	chrIII
CDC50	OCA4	233	286762-287937	288170-289258	chrIII
YCR095W-A	HMRA2	3382	289639-289797	293179-293538	chrIII
YCR097W-A	GIT1	2344	294439-294705	297049-298605	chrIII
AAD3	YCR108C	1016	313890-314981	315997-316188	chrIII
MPH2	SOR2	869	5985-7814	8683-9756	chrIV
THI13	AAD4	351	16204-17226	17577-18566	chrIV
YDL241W	YDL240C-A	1465	20635-21006	22471-22608	chrIV
LRG1	ADY3	527	22823-25876	26403-28775	chrIV
PHO13	YPD1	181	32296-33234	33415-33918	chrIV
OST4	BRE4	270	38487-38597	38867-42244	chrIV
SHS1	WHI4	297	52445-54100	54397-56346	chrIV
YDL218W	TIM22	537	66493-67446	67983-68606	chrIV
SHR3	YDL211C	236	78426-79058	79294-80412	chrIV
UGA4	CWC2	222	84270-85985	86207-87226	chrIV
YDL206W	HEM3	298	90176-92464	92762-93745	chrIV
RTN2	ACK1	296	94605-95786	96082-97953	chrIV
TRM8	MGT1	80	99561-100421	100501-101067	chrIV
RPL35A	UFD2	190	117664-118517	118707-121592	chrIV
RBS1	PPH22	276	122078-123589	123865-124998	chrIV
YDL186W	YDL185C-A	159	125616-126449	126608-126835	chrIV
VMA1	RPL41A	405	126787-130002	130407-130484	chrIV
DLD2	YDL177C	95	139522-141114	141209-141721	chrIV
IPF1	AIR2	261	142097-144223	144484-145518	chrIV
UGA3	UGX2	160	156318-157904	158064-158735	chrIV
SFA1	NRP1	231	159604-160764	160995-163154	chrIV
CDC36	CDC9	122	164290-164865	164987-167254	chrIV
YDL163W	YDL162C	101	166956-167258	167359-167715	chrIV
ENT1	MHF2	288	167714-169078	169366-169608	chrIV
MSH5	SAS10	147	178334-181039	181186-183018	chrIV
YDL152W	BUD30	131	182822-183187	183318-183899	chrIV
ATG9	NOP14	236	184925-187918	188154-190586	chrIV
LDB17	COP1	346	192750-194225	194571-198176	chrIV
CCT4	CRD1	137	199996-201582	201719-202570	chrIV
BPL1	RPO21	249	203039-205111	205360-210561	chrIV
RPL35B	RDI1	313	217600-218367	218680-219288	chrIV
PCL2	CDC48	304	234927-235853	236157-238664	chrIV
UBP1	EXP1	152	242552-244981	245133-245582	chrIV
YFH1	HEM25	242	245923-246447	246689-247612	chrIV
NUP84	IWR1	249	251566-253746	253995-255126	chrIV
YDL114W	ATG20	103	255604-256530	256633-258555	chrIV
TRM3	RRP42	88	258915-263225	263313-264110	chrIV
MSS2	PHO2	246	268921-269976	270222-271901	chrIV
NSE4	QRI7	56	272389-273597	273653-274876	chrIV
POL3	DUN1	142	276872-280165	280307-281848	chrIV
BUG1	SNU23	137	283419-284444	284581-285165	chrIV
PMT1	YDL094C	60	287059-289512	289572-290081	chrIV
SRP14	UBX3	171	292781-293221	293392-294759	chrIV
NUR1	ASM4	143	296820-298274	298417-300003	chrIV
SUB2	RPS16B	349	305237-306577	306926-307789	chrIV
RPL13A	RPP1A	414	308424-309388	309802-310122	chrIV
RPL31A	BRE1	1059	322226-322988	324047-326149	chrIV
AHK1	YET3	269	326613-329567	329836-330447	chrIV
BDF2	CBS1	181	331024-332940	333121-333810	chrIV
YDL068W	COX9	388	333500-333829	334217-334396	chrIV
IDP1	PEX19	128	334835-336121	336249-337277	chrIV
UBC9	SYO1	202	337487-338070	338272-340134	chrIV
YDL062W	RPS29B	346	339857-340282	340628-341219	chrIV
TSR1	RAD59	252	341619-343985	344237-344953	chrIV
MBP1	PSA1	296	352877-355378	355674-356759	chrIV
MRP10	FAD1	153	372248-372535	372688-373608	chrIV
YDL041W	NAT1	419	378102-378455	378874-381438	chrIV
YDL034W	SLM3	532	391783-392127	392659-393912	chrIV
ARP2	MPS1	359	399340-400638	400997-403291	chrIV
YDL026W	RTK1	284	404749-405060	405344-407206	chrIV
YDL025W-A	DIA3	2937	405410-405514	408451-409857	chrIV
GPM2	RPN4	225	413953-414888	415113-416708	chrIV
SLX5	YDL012C	182	429067-430926	431108-431517	chrIV
APC11	YDL007C-A	2573	433497-433994	436567-436824	chrIV
PTC1	MED2	260	439909-440754	441014-442309	chrIV
MCD1	NHP10	584	444683-446383	446967-447578	chrIV
RMD1	NTH1	944	447984-449276	450220-452475	chrIV
RAD57	MAF1	253	455201-456583	456836-458103	chrIV
GAL3	YDR010C	55	463434-464996	465051-465383	chrIV
FAL1	ATG31	69	486804-488003	488072-488662	chrIV
RPS11A	NSI1	232	491515-492324	492556-494268	chrIV
YDR029W	RAD28	339	501100-501414	501753-503273	chrIV
MIX14	PST2	236	503498-503863	504099-504695	chrIV
MRH1	LYS14	628	508147-509109	509737-512109	chrIV
ARO3	EHD3	283	521816-522928	523211-524713	chrIV
KRS1	ENA5	207	525440-527215	527422-530697	chrIV
RSM10	YDR042C	187	539803-540414	540601-541203	chrIV
HEM13	RPC11	350	546642-547628	547978-548310	chrIV
HEM12	YDR048C	136	551860-552948	553084-553398	chrIV
VMS1	TPI1	574	553254-555152	555726-556472	chrIV
YDR053W	CDC34	796	560249-560644	561440-562327	chrIV
PST1	EMC10	162	563527-564861	565023-565640	chrIV
YOS9	TGL2	168	565927-567555	567723-568703	chrIV
RRG1	RTR2	124	580687-581784	581908-582498	chrIV
DOS2	DOA4	294	583713-584645	584939-587719	chrIV
SED1	SHU2	389	600793-601809	602198-602869	chrIV
PET100	TFB5	194	603064-603399	603593-603811	chrIV
VPS41	PDC2	318	604008-606986	607304-610081	chrIV
RRP8	TVP23	154	612073-613251	613405-614004	chrIV
VTC5	ILT1	345	622112-624721	625066-625998	chrIV
GIS1	MSH6	286	637139-639823	640109-643837	chrIV
TVP15	ARX1	242	655013-655444	655686-657467	chrIV
STE5	SPO71	70	658350-661103	661173-664910	chrIV
ARP10	TMN2	1158	667004-667858	669016-671034	chrIV
TRS85	YDR109C	155	671269-673365	673520-675667	chrIV
FOB1	ALT2	439	676102-677802	678241-679764	chrIV
IRC2	PDS1	644	679544-679852	680496-681617	chrIV
MRX14	MRPL1	232	682175-682492	682724-683581	chrIV
COX26	TRM1	335	691014-691214	691549-693261	chrIV
KIN1	INO2	660	694700-697894	698554-699468	chrIV
YDR124W	ECM18	108	700315-701289	701397-702758	chrIV
MTC5	SAC6	345	709549-712995	713340-715379	chrIV
HPR1	RUB1	782	730578-732836	733618-733924	chrIV
MTQ2	DOP1	98	734138-734803	734901-739997	chrIV
TAF12	SWI5	256	746738-748357	748613-750742	chrIV
EKI1	KGD2	440	751631-753235	753675-755066	chrIV
NUM1	CTH1	304	755628-763874	764178-765155	chrIV
GIR2	ENT5	233	765706-766503	766736-767971	chrIV
ACL4	NBP2	184	779043-780206	780390-781100	chrIV
CWC15	SEC1	91	781423-781950	782041-784215	chrIV
TRM82	SEC5	101	784871-786205	786306-789221	chrIV
CDC37	STB3	500	790328-791848	792348-793889	chrIV
SUP35	ARG82	184	808324-810381	810565-811632	chrIV
HMO1	RSM24	343	812110-812850	813193-814152	chrIV
SDH4	CSN9	213	817950-818495	818708-819196	chrIV
SCC2	SAS4	134	821295-825776	825910-827355	chrIV
PLP1	YDR183C-A	120	829585-830277	830397-830654	chrIV
SLY1	RVB1	212	838392-840392	840604-841995	chrIV
HST4	NUP42	120	842337-843449	843569-844861	chrIV
YDR193W	MSS116	1000	844554-844952	845952-847946	chrIV
REF2	CAB5	74	848599-850200	850274-850999	chrIV
CBS2	RKM2	136	851228-852397	852533-853972	chrIV
SPC19	RAV2	84	856317-856814	856898-857953	chrIV
EBS1	UME6	304	862054-864708	865012-867522	chrIV
MSS4	YDR209C	473	868224-870563	871036-871449	chrIV
AHA1	YDR215C	162	892875-893927	894089-894502	chrIV
ADR1	RAD9	545	895035-899006	899551-903480	chrIV
CRF1	HTB1	815	912099-913502	914317-914712	chrIV
SIR4	PCF11	279	917571-921647	921926-923806	chrIV
HEM1	RTN1	372	927452-929098	929470-930357	chrIV
PRP42	FMN1	98	933504-935138	935236-935892	chrIV
MRPL7	SEC26	402	936615-937493	937895-940816	chrIV
AMD2	PRP28	62	946807-948456	948518-950284	chrIV
VHS1	YDR248C	360	956013-957398	957758-958339	chrIV
BTT1	MET32	129	963412-963861	963990-964565	chrIV
CHL4	RMD5	68	965113-966489	966557-967822	chrIV
YDR262W	DIN7	290	993134-993952	994242-995534	chrIV
PEX10	HEL2	227	998864-999877	1000104-1002023	chrIV
MSW1	YDR269C	522	1004004-1005143	1005665-1005988	chrIV
DON1	YDR274C	316	1010176-1011273	1011589-1011960	chrIV
BSC2	PMP3	517	1012252-1012959	1013476-1013643	chrIV
RRP45	PHM6	343	1020747-1021664	1022007-1022321	chrIV
ZIP1	MGP12	168	1032436-1035063	1035231-1035575	chrIV
NSE3	RTT103	174	1037195-1038106	1038280-1039509	chrIV
HRQ1	SRP101	185	1039728-1042961	1043146-1045011	chrIV
SUR2	ATP5	576	1056551-1057600	1058176-1058814	chrIV
BFR2	PRO1	274	1059627-1061231	1061505-1062791	chrIV
GPI11	RSC3	339	1067731-1068390	1068729-1071386	chrIV
PMT7	SRB7	174	1075865-1077853	1078027-1078449	chrIV
SSF2	PIB1	277	1087581-1088942	1089219-1090079	chrIV
MCM21	YFT2	56	1103758-1104947	1105003-1105827	chrIV
MRPL35	TIM11	311	1110589-1111692	1112003-1112293	chrIV
YCG1	YSP2	376	1117126-1120233	1120609-1124925	chrIV
IRC3	RQC1	190	1131001-1133070	1133260-1135431	chrIV
MRPS28	YDR338C	200	1146319-1147179	1147379-1149466	chrIV
YDR340W	YDR341C	620	1150881-1151183	1151803-1153626	chrIV
MRP1	PAL1	183	1169178-1170143	1170326-1171825	chrIV
SPC110	CNL1	258	1186107-1188941	1189199-1189567	chrIV
GGA1	EAF1	204	1190059-1191732	1191936-1194884	chrIV
OPI7	BCP1	380	1194598-1195032	1195412-1196263	chrIV
SEM1	CDC40	446	1202128-1202397	1202843-1204210	chrIV
YPR1	XRS2	174	1213904-1214842	1215016-1217580	chrIV
FRQ1	PHO92	143	1222759-1223331	1223474-1224394	chrIV
WIP1	BCS1	140	1224757-1225026	1225166-1226536	chrIV
ATP17	LSM6	433	1228611-1228916	1229349-1229609	chrIV
RGA2	SDH6	82	1230167-1233196	1233278-1233517	chrIV
YRA1	COI1	308	1236558-1238004	1238312-1238850	chrIV
RPP2B	NKP1	136	1239492-1239824	1239960-1240676	chrIV
MUS81	CIN10	172	1246084-1247982	1248154-1249821	chrIV
SAC7	UBA2	436	1252537-1254501	1254937-1256847	chrIV
DIT1	RPB7	442	1274602-1276212	1276654-1277169	chrIV
YDR406W-A	TRS120	25	1283799-1284044	1284069-1287938	chrIV
SIZ1	STE14	252	1289406-1292120	1292372-1293091	chrIV
SYF1	YDR417C	544	1298432-1301011	1301555-1301926	chrIV
ARO80	SIP1	434	1312040-1314892	1315326-1317773	chrIV
RPN9	BNA7	68	1322205-1323386	1323454-1324239	chrIV
GPI17	PPM1	142	1331237-1332841	1332983-1333969	chrIV
DOT1	APT2	276	1342493-1344241	1344517-1345062	chrIV
ECM11	RPS17B	196	1353725-1354633	1354829-1355553	chrIV
ADA2	UTP6	211	1356065-1357369	1357580-1358902	chrIV
RPS18A	YHP1	322	1359923-1360798	1361120-1362181	chrIV
PPN1	TSA2	170	1362878-1364902	1365072-1365662	chrIV
TOM1	HEH2	459	1369790-1379596	1380055-1382046	chrIV
MFA1	CMI8	238	1385176-1385286	1385524-1385766	chrIV
SDC1	UGO1	164	1399015-1399542	1399706-1401214	chrIV
TRS31	PRP3	272	1403322-1404173	1404445-1405854	chrIV
SNM1	PEX29	39	1414575-1415171	1415210-1416874	chrIV
DIG2	PHO8	180	1417399-1418370	1418550-1420250	chrIV
VPS52	VPS72	132	1422763-1424688	1424820-1427207	chrIV
SLD5	PKH1	72	1431012-1431896	1431968-1434268	chrIV
RSM28	VPS3	100	1436930-1438015	1438115-1441150	chrIV
LCD1	RPL37B	125	1447830-1450073	1450198-1450853	chrIV
PLM2	SAM2	392	1451353-1452918	1453310-1454464	chrIV
SDH7	EMI1	82	1470017-1470418	1470500-1471063	chrIV
GRX2	YDR514C	100	1471017-1471448	1471548-1472999	chrIV
SLF1	EMI2	202	1473429-1474772	1474974-1476476	chrIV
FPR2	URC2	253	1480425-1480832	1481085-1483403	chrIV
YDR521W	SPS2	319	1483141-1483476	1483795-1485303	chrIV
YDR524W-C	YDR524C-B	106	1489403-1489492	1489598-1489798	chrIV
SNA2	YDR526C	240	1490596-1490835	1491075-1491545	chrIV
HLR1	QCR7	308	1494586-1495857	1496165-1496548	chrIV
CAB1	KRE28	61	1498232-1499335	1499396-1500553	chrIV
STL1	YDR537C	1142	1508005-1509714	1510856-1511461	chrIV
FDC1	IRC4	3531	1512094-1513605	1517136-1517675	chrIV
PAU10	YDR543C	1023	1523249-1523611	1524634-1524933	chrIV
YEL077W-A	YEL076C-A	3073	630-1112	4185-5114	chrV
YEL074W	YEL073C	766	6126-6464	7230-7553	chrV
DSF1	HXT13	440	19589-21097	21537-23231	chrV
SIT1	AVT2	254	27657-29543	29797-31239	chrV
NPR2	CIN8	281	34407-36254	36535-39537	chrV
PCM1	SDD1	95	43252-44925	45020-45721	chrV
HAT2	POL5	98	47168-48373	48471-51539	chrV
YEL053W-A	MAK10	646	52908-53255	53901-56102	chrV
PAU2	TCA17	619	63728-64090	64709-65167	chrV
UTR2	CYC7	180	78053-79456	79636-79977	chrV
UTR4	RAD23	262	80462-81145	81407-82603	chrV
SPF1	YEL030C-A	678	90258-93905	94583-94897	chrV
ECM10	BUD16	280	94644-96578	96858-97796	chrV
SNU13	YEL025C	258	101943-102323	102581-106147	chrV
RIP1	YEL023C	597	107260-107907	108504-110552	chrV
URA3	YEL020C-B	213	116167-116970	117183-117380	chrV
TIM9	PXP1	1143	117211-117474	118617-120299	chrV
EAF5	PMP2	488	121471-122310	122798-122929	chrV
GTT3	NPP2	67	123657-124670	124737-126218	chrV
EDC3	YEL014C	19	126629-128284	128303-128608	chrV
YEA6	VAB2	573	144327-145334	145907-146755	chrV
GIM4	WBP1	123	148176-148599	148722-150014	chrV
NOP16	PMI40	238	156803-157498	157736-159118	chrV
NUG1	YER006C-A	59	162723-164285	164344-164661	chrV
PAC2	TMA20	154	164527-166083	166237-166885	chrV
NTF2	YER010C	142	172115-172492	172634-173338	chrV
BIM1	AFG3	192	188277-189311	189503-191788	chrV
ISC1	SBH2	43	192797-194230	194273-194539	chrV
GCD11	CHO1	810	205251-206834	207644-208474	chrV
CHZ1	YPT31	178	213437-213898	214076-214747	chrV
FIR1	ZRG8	364	215063-217693	218057-221287	chrV
EDC2	ARB1	291	222639-223076	223367-225199	chrV
PHM8	KRE29	4	225889-226854	226858-228252	chrV
MXR1	SAH1	279	234937-235491	235770-237119	chrV
TPA1	RSM18	309	251728-253662	253971-254387	chrV
JHD1	HOM3	241	254656-256134	256375-257958	chrV
FCY22	CEM1	134	276572-278164	278298-279626	chrV
THO1	VHR2	339	281710-282366	282705-284222	chrV
RRT13	YER066C-A	904	290242-290799	291703-292203	chrV
MOT2	YER068C-A	488	293050-294813	295301-295732	chrV
RNR1	TDA2	331	298950-301616	301947-302327	chrV
YOS1	PTP3	290	307653-308123	308413-311199	chrV
YER076W-A	MRX1	797	313390-313737	314534-316600	chrV
YER079W	YER079C-A	350	318920-319552	319902-320240	chrV
SER3	UTP7	177	322686-324095	324272-325936	chrV
IES5	TSC11	88	342855-343232	343320-347612	chrV
UBP9	PRS2	375	355466-357730	358105-359061	chrV
UBC6	AST2	188	359562-360314	360502-361794	chrV
RTT105	NUP157	410	366802-367428	367838-372013	chrV
MAM1	GLE2	214	372326-373234	373448-374545	chrV
YER107W-A	KAP123	4048	374394-374714	378762-382103	chrV
LSM4	TMN3	137	387232-387795	387932-390052	chrV
RPL23B	SHO1	299	396769-397653	397952-399055	chrV
YER121W	GLO3	152	402375-402719	402871-404352	chrV
YCK3	DSE1	955	404813-406387	407342-409063	chrV
RSP5	NSA2	776	410189-412618	413394-414179	chrV
SAK1	COM2	406	417281-420709	421115-422446	chrV
RPS26B	PMD1	877	423591-424311	425188-430449	chrV
GDI1	YER137C	402	439616-440971	441373-441819	chrV
YER138W-A	RTR1	985	449474-449578	450563-451243	chrV
COX15	MAG1	227	453459-454919	455146-456036	chrV
DDI1	UBP5	201	456319-457605	457806-460223	chrV
LSM5	SCC4	102	462585-462866	462968-464842	chrV
SPI1	UBP3	870	468370-468816	469686-472424	chrV
OXA1	BEM2	117	475020-476228	476345-482848	chrV
COG3	YER158C	1664	484788-487193	488857-490578	chrV
PAB1	YER165C-A	521	510373-512106	512627-512983	chrV
BCK2	CCA1	258	518216-520771	521029-522669	chrV
RAD3	BRR2	112	527082-529418	529530-536021	chrV
RAD24	GRX4	155	536300-538279	538434-539168	chrV
DMC1	ISC10	207	548421-549517	549724-550527	chrV
FMP10	FAU1	75	552525-553259	553334-553969	chrV
PUG1	YER186C	1340	559454-560365	561705-562625	chrV
YER188W	YER188C-A	849	568040-568759	569608-569907	chrV
YFL067W	YFL066C	74	836-1363	1437-2615	chrVI
DDI2	SNO3	79	9545-10222	10301-10969	chrVI
AGP3	AQY3	2167	17004-18680	20847-22787	chrVI
ZNF1	YFL051C	429	28232-29629	30058-30540	chrVI
SWP82	EMP47	169	36803-38674	38843-40180	chrVI
FMP32	SEC53	190	42815-43438	43628-44392	chrVI
YFL040W	ACT1	288	51350-52972	53260-54696	chrVI
RPO41	MOB2	179	58782-62837	63016-63993	chrVI
MIL1	RIM15	417	65477-68698	69115-74427	chrVI
AGX1	CAK1	67	76831-77988	78055-79161	chrVI
STE2	BST1	270	82580-83875	84145-87234	chrVI
BUD27	FRS2	123	90986-93376	93499-95010	chrVI
GAT1	PAU5	1733	95966-97498	99231-99599	chrVI
SMX2	GNA1	51	103699-103932	103983-104462	chrVI
VTC2	MSH4	225	131810-134296	134521-137157	chrVI
NIC96	YPI1	122	150016-152535	152657-153124	chrVI
RPN11	SAD1	214	153393-154313	154527-155873	chrVI
IOC3	CMK1	252	169922-172285	172537-173877	chrVI
PES4	LSB3	251	199874-201709	201960-203433	chrVI
ECO1	CDC14	116	207452-208297	208413-210068	chrVI
MET10	SMC2	175	213312-216419	216594-220106	chrVI
IRC5	OSW7	71	229380-231941	232012-233544	chrVI
SAP155	ERJ5	118	234242-237250	237368-238255	chrVI
KEG1	IRC6	54	238458-239060	239114-239827	chrVI
YFR045W	CNN1	75	241998-242999	243074-244159	chrVI
YMR31	PRE4	172	248523-248894	249066-249866	chrVI
RPN12	YFR052C-A	100	252505-253329	253429-253734	chrVI
YGL262W	PAU11	451	5312-5839	6290-6652	chrVII
VEL1	MNT2	751	11110-11730	12481-14157	chrVII
HXK2	RTG2	323	23935-25395	25718-27484	chrVII
BRR6	RAI1	91	36933-37526	37617-38780	chrVII
TAD1	YGL242C	143	43307-44509	44652-45197	chrVII
DOC1	YGL239C	66	48613-49365	49431-49745	chrVII
CSE1	HAP2	297	49552-52434	52731-53528	chrVII
TAN1	EMC4	46	62075-63002	63048-63620	chrVII
VID30	OST5	202	69671-72547	72749-73158	chrVII
VRG4	SDT1	108	76894-77907	78015-78857	chrVII
BOL2	MDM34	142	82374-82736	82878-84257	chrVII
YGL218W	YGL217C	539	83650-84300	84839-85180	chrVII
SPT16	CHC1	467	98969-102076	102543-107504	chrVII
POX1	YGL204C	1296	108158-110404	111700-112005	chrVII
ARO8	MCM6	293	116059-117561	117854-120907	chrVII
GCN1	YGL194C-A	176	131525-139543	139719-139961	chrVII
COX13	CDC55	612	144808-145197	145809-147389	chrVII
ATG1	TOS3	651	160065-162758	163409-165091	chrVII
YGL177W	YGL176C	3509	167559-167906	171415-173079	chrVII
BUD13	XRN1	182	174545-175345	175527-180113	chrVII
ROK1	SPO74	69	182390-184084	184153-185394	chrVII
SUT1	YIP5	173	198138-199037	199210-200142	chrVII
CDC43	LYS5	67	214081-215211	215278-216096	chrVII
NUT1	INO80	182	217524-220922	221104-225573	chrVII
ARO2	RPL9A	225	226399-227529	227754-228329	chrVII
TIP20	ROG1	102	230243-232348	232450-234507	chrVII
HUL5	YGL140C	268	238353-241085	241353-245012	chrVII
FLC3	YGL138C	370	245716-248124	248494-249531	chrVII
SEC27	MRM2	159	249869-252738	252897-253859	chrVII
CEG1	RSM23	199	266145-267524	267723-269075	chrVII
MET13	MON1	458	272520-274322	274780-276714	chrVII
COQ8	YGL118C	2067	284442-285947	288014-288451	chrVII
SLD3	TAF6	240	295932-297938	298178-299728	chrVII
NSA1	CUE3	168	299978-301369	301537-303411	chrVII
ARC1	VPS73	146	307437-308567	308713-310173	chrVII
TOS8	VPS45	2713	325331-326161	328874-330607	chrVII
NUP145	NBP35	197	337906-341859	342056-343042	chrVII
LIF1	MF%28ALPHA%292	207	343319-344584	344791-345153	chrVII
YGL088W	MMS2	205	345836-346201	346406-346904	chrVII
LCL3	GUP1	176	349616-350440	350616-352298	chrVII
KXD1	DBP3	188	359444-360100	360288-361859	chrVII
AFT1	RPB9	375	372012-374084	374459-374827	chrVII
SGF73	ALG2	178	377609-379582	379760-381271	chrVII
PYC1	DUO1	236	385196-388732	388968-389711	chrVII
RAD6	GEP7	462	393986-394504	394966-395829	chrVII
OLE1	ERV14	711	398628-400160	400871-401287	chrVII
TYW3	TIF4632	263	405776-406597	406860-409604	chrVII
RIM8	RNA15	416	414102-415730	416146-417036	chrVII
YGL039W	OCH1	355	423961-425007	425362-426804	chrVII
YGL036W	MIG1	218	428601-431330	431548-433062	chrVII
HOP2	AGA2	169	435625-436401	436570-436833	chrVII
CGR1	SCW11	856	440063-440425	441281-442909	chrVII
YGL024W	PIB2	74	449788-450123	450197-452104	chrVII
ALK1	GET1	96	454785-457067	457163-457870	chrVII
CKB1	JAC1	118	458156-458992	459110-459664	chrVII
KAP122	YGL015C	132	461666-464911	465043-465435	chrVII
ERG4	SCL1	213	472855-474276	474489-475247	chrVII
MPO1	LEU1	244	475545-476069	476313-478652	chrVII
PMC1	COG7	266	485921-489442	489708-490547	chrVII
ERP6	ERG26	286	494517-495167	495453-496502	chrVII
PEX31	TFG2	331	502938-504326	504657-505859	chrVII
ECT1	STF2	170	506969-507940	508110-508364	chrVII
MSB2	EAT1	227	516943-520863	521090-522076	chrVII
UGA1	VMA7	329	525229-526644	526973-527329	chrVII
DPC29	YGR022C	753	527632-528504	529257-529586	chrVII
MTL1	THG1	964	529264-530919	531883-532596	chrVII
YGR026W	RPS25A	311	532985-533821	534132-534785	chrVII
ERV1	POP6	1476	543553-544205	545681-546157	chrVII
GSC2	TIM21	297	548264-553951	554248-554967	chrVII
RPL26B	YGR035C	400	555812-556672	557072-557422	chrVII
YGR035W-A	CAX4	363	557565-557786	558149-558868	chrVII
MTE1	NQM1	144	579476-580291	580435-581436	chrVII
TAM41	TFC4	340	584895-586052	586392-589469	chrVII
SCM4	YGR050C	209	591314-591877	592086-592442	chrVII
FMP48	MCO32	281	593596-594705	594986-595837	chrVII
RSC1	LST7	326	601661-604447	604773-605501	chrVII
ERG25	ADE6	396	610564-611493	611889-615965	chrVII
YGR064W	VHT1	88	617621-617989	618077-619858	chrVII
ROM1	ENV11	208	627806-631273	631481-634063	chrVII
UPF3	YGR073C	148	634304-635467	635615-635986	chrVII
TWF1	SLX9	140	642010-643008	643148-643780	chrVII
TOM20	GCD2	265	644044-644595	644860-646815	chrVII
VAS1	RRP46	171	672186-675500	675671-676342	chrVII
ASK10	ESP1	431	678695-682135	682566-687458	chrVII
PCP1	GTF1	181	693363-694403	694584-695135	chrVII
NOP7	SRB5	211	695417-697234	697445-698368	chrVII
VMA21	VOA1	157	698599-698832	698989-699786	chrVII
CLB1	CLB6	308	703636-705051	705359-706501	chrVII
DAM1	YGR114C	341	718893-719924	720265-720654	chrVII
SPT6	YGR117C	285	720409-724764	725049-726479	chrVII
RPS23A	NUP57	316	726974-727730	728046-729671	chrVII
YGR122W	YGR122C-A	487	733935-735143	735630-735758	chrVII
YGR127W	UTP8	214	746798-747736	747950-750091	chrVII
SYF2	YGR130C	347	750400-751047	751394-753844	chrVII
FHN1	PHB1	339	754726-755250	755589-756452	chrVII
YGR137W	TPO2	500	762888-763262	763762-765606	chrVII
ENP2	ECL1	333	781767-783890	784223-784858	chrVII
GPC1	CCM1	130	789031-790329	790459-793053	chrVII
YGR153W	GTO1	53	796092-796745	796798-797868	chrVII
CHO2	MTR3	220	802440-805049	805269-806021	chrVII
YGR160W	RTS3	945	807073-807684	808629-809420	chrVII
CLC1	PEX35	195	832456-833157	833352-834482	chrVII
PSD2	MSM1	266	837142-840558	840824-842551	chrVII
RBG2	CBP4	933	843854-844960	845893-846405	chrVII
YGR174W-A	ERG1	192	846655-846741	846933-848423	chrVII
TFG1	HGH1	251	867774-869981	870232-871416	chrVII
HIP1	TDH3	581	880420-882231	882812-883810	chrVII
SKI6	FYV8	111	888882-889622	889733-892186	chrVII
PMT6	ELP2	123	897502-899781	899904-902270	chrVII
ADE3	YGR204C-A	287	905934-908774	909061-909174	chrVII
MVB12	CIR1	106	910432-910737	910843-911628	chrVII
SER2	TRX2	101	911883-912812	912913-913227	chrVII
SLI1	RTA1	66	917040-918446	918512-919465	chrVII
RSM27	GPI1	126	922175-922507	922633-924462	chrVII
PET54	HSV2	65	939923-940804	940869-942215	chrVII
BNS1	PHB2	241	951894-952307	952548-953480	chrVII
NAS6	PHO81	28	953960-954646	954674-958210	chrVII
YHB1	MIC26	257	959904-961103	961360-962061	chrVII
MPC3	LSC2	260	977336-977776	978036-979319	chrVII
MGA1	RIE1	1757	988049-989419	991176-993521	chrVII
GCN5	PUP2	170	996869-998188	998358-999140	chrVII
ENO1	COQ6	283	1000927-1002240	1002523-1003962	chrVII
GND2	MTM1	103	1004624-1006102	1006205-1007305	chrVII
TNA1	APL6	232	1012485-1014089	1014321-1016750	chrVII
YGR266W	FOL2	243	1022656-1024761	1025004-1025735	chrVII
SLH1	EFG1	106	1031791-1037694	1037800-1038501	chrVII
RTT102	RNH70	70	1043276-1043749	1043819-1045480	chrVII
CWC22	SCW4	334	1046731-1048464	1048798-1049958	chrVII
YOR1	BGL2	526	1052824-1057257	1057783-1058724	chrVII
MAL13	MAL11	2249	1070293-1071714	1073963-1075813	chrVII
YGR290W	YGR291C	358	1075482-1075925	1076283-1076504	chrVII
MAL12	YGR293C	1532	1076599-1078353	1079885-1080346	chrVII
PAU12	COS6	916	1080306-1080668	1081584-1082729	chrVII
YHL050W-A	YHL049C	2433	811-1293	3726-4541	chrVIII
COS8	ARN2	805	6401-7546	8351-10213	chrVIII
YHL046W-A	PAU13	1616	9981-10307	11923-12285	chrVIII
YHL041W	ARN1	1247	17392-17841	19088-20971	chrVIII
EFM1	CBP2	77	21783-23540	23617-25509	chrVIII
MUP3	VMR1	97	26241-27881	27978-32756	chrVIII
ECM29	OCA5	239	40084-45690	45929-47968	chrVIII
RIM101	YHL026C	231	51111-52988	53219-54166	chrVIII
RIM4	NPR3	333	56649-58790	59123-62563	chrVIII
YHL017W	DUR3	163	70276-71874	72037-74244	chrVIII
RPS20	YLF2	320	75412-75777	76097-77314	chrVIII
YHL012W	PRS3	237	78936-80417	80654-81616	chrVIII
YHL006W-A	SHU1	258	97732-98085	98343-98795	chrVIII
MRP4	LAG1	245	99219-100403	100648-101883	chrVIII
LEU5	TCD1	143	108812-109885	110028-111317	chrVIII
STP2	ERG11	652	117814-119439	120091-121683	chrVIII
VPS29	ARD1	282	129481-130448	130730-131446	chrVIII
MIP6	YSC84	348	134554-136533	136881-138455	chrVIII
YSC83	ARG4	160	138694-139851	140011-141402	chrVIII
YHR020W	RPS27B	1809	143996-146062	147871-148669	chrVIII
MYO1	MAS2	292	151666-157452	157744-159192	chrVIII
VMA16	RPN1	245	160844-161485	161730-164711	chrVIII
YHR028W-A	YHI9	5	167352-167672	167677-168561	chrVIII
YHR033W	PIH1	146	175548-176819	176965-177999	chrVIII
RRF1	MSC7	117	184066-184758	184875-186809	chrVIII
BCD1	SRB2	107	187924-189024	189131-189864	chrVIII
NCP1	DOG2	187	190543-192618	192805-193545	chrVIII
YHR045W	INM1	165	195551-197233	197398-198285	chrVIII
FSH1	YHR049C-A	41	206462-207193	207234-207530	chrVIII
YHR056W-A	CPR2	386	217406-217840	218226-218843	chrVIII
VMA22	GIC1	264	220725-221270	221534-222478	chrVIII
DYS1	RRP4	283	232133-233296	233579-234658	chrVIII
PCL5	YHR071C-A	1217	237004-237693	238910-239230	chrVIII
YHR073W-A	YHR073C-B	2378	242868-243044	245422-245502	chrVIII
QNS1	PPE1	102	246193-248337	248439-249641	chrVIII
PTC7	NMD2	149	251101-252225	252374-255756	chrVIII
YHR078W	IRE1	226	256360-258018	258244-261591	chrVIII
LRP1	KSP1	367	267538-268092	268459-271548	chrVIII
RPF1	GAR1	299	281495-282382	282681-283298	chrVIII
AHT1	HXT1	1223	289142-289690	290913-292625	chrVIII
YHR095W	HXT5	1232	292943-293437	294669-296447	chrVIII
TRA1	GEP4	121	302761-313995	314116-314673	chrVIII
TRR2	CDC12	187	325598-326626	326813-328036	chrVIII
UBA4	YHR112C	133	333072-334394	334527-335663	chrVIII
BZZ1	DMA1	125	338083-339984	340109-341359	chrVIII
TOM71	ORC6	53	342349-344268	344321-345628	chrVIII
YHR125W	ANS1	539	358858-359163	359702-360181	chrVIII
FUR1	ARP1	234	362115-362765	362999-364153	chrVIII
YHR131W-A	ECM14	510	367747-367992	368502-369794	chrVIII
IGO2	NSG1	273	370054-370449	370722-371597	chrVIII
WSS1	YCK1	136	371749-372558	372694-374310	chrVIII
YHR140W	RPL42B	699	380572-381291	381990-382751	chrVIII
RPC10	DCD1	343	387233-387445	387788-388726	chrVIII
CRP1	MRPL6	942	390300-391697	392639-393283	chrVIII
IMP3	SKG6	370	393534-394085	394455-396659	chrVIII
PEX28	MTC6	278	397251-398990	399268-400848	chrVIII
SPO12	SPO16	131	401434-401955	402086-402682	chrVIII
LAM1	LIN1	595	407103-410789	411384-412406	chrVIII
REC104	KEL1	230	412907-413455	413685-417179	chrVIII
TDA11	PEX18	158	417549-419063	419221-420072	chrVIII
SOL3	DNA2	137	423724-424473	424610-429178	chrVIII
YHR165W-A	CDC23	212	436647-436958	437170-439050	chrVIII
SPC97	YHR173C	9	448335-450806	450815-451153	chrVIII
YHR182W	YHR182C-A	363	468219-470576	470939-471412	chrVIII
SSP1	PFS1	168	472744-474459	474627-475340	chrVIII
IKI1	GPI16	86	480990-481919	482005-483837	chrVIII
ERG9	CTF8	51	484845-486179	486230-486631	chrVIII
LNP1	EGD2	50	486826-487662	487712-488236	chrVIII
RIX1	AIM18	128	493896-496187	496315-497280	chrVIII
RPN10	PPX1	65	499079-499885	499950-501143	chrVIII
YHR202W	RPS4B	280	502388-504196	504476-505530	chrVIII
SKN7	SET5	305	512732-514600	514905-516485	chrVIII
CRG1	YHR210C	400	519437-520312	520712-521737	chrVIII
FLO5	YHR212C	9140	525392-528619	537759-538094	chrVIII
YHR214W-A	YHR214C-D	7155	543008-543493	550648-550941	chrVIII
IMD2	YHR217C	614	554396-555967	556581-557042	chrVIII
YIL177W-A	PAU14	7465	846-1328	8793-9155	chrIX
VTH1	IMA3	643	11492-16141	16784-18553	chrIX
YIL171W-A	CSS1	4407	18260-18712	23119-26106	chrIX
YIL161W	POT1	51	39433-40140	40191-41444	chrIX
AIM20	COA1	134	46201-46815	46949-47542	chrIX
UBP7	GUT2	453	48091-51306	51759-53708	chrIX
YIL152W	ESL1	86	56545-57252	57338-60694	chrIX
RPL40A	SLN1	263	68708-69528	69791-73453	chrIX
NDC80	SSL2	361	78074-80149	80510-83041	chrIX
AXL2	REV7	142	85366-87837	87979-88716	chrIX
OM45	VHS2	265	93619-94800	95065-96375	chrIX
FLX1	RPL16A	197	97395-98330	98527-99416	chrIX
ASG1	TAO3	431	102782-105676	106107-113237	chrIX
MET18	RRT14	120	113806-116904	117024-117644	chrIX
QDR1	RPI1	546	134417-136108	136654-137877	chrIX
RHO3	PRM5	166	139752-140447	140613-141569	chrIX
HPM1	SEC24	207	156045-157178	157385-160165	chrIX
YIL108W	PFK26	301	160887-162977	163278-165761	chrIX
MOB1	SLM1	137	166415-167444	167581-169641	chrIX
YIL105W-A	SHQ1	2178	167664-167804	169982-171505	chrIX
DPH1	YIL102C-A	337	171751-173028	173365-173592	chrIX
SGA1	FMC1	119	178004-179653	179772-180239	chrIX
FYV10	BMT5	140	180427-181977	182117-183127	chrIX
PRK1	LYS12	148	183937-186369	186517-187632	chrIX
YIL092W	UTP25	63	189066-190967	191030-193195	chrIX
YIL089W	AVT7	1715	195599-196216	197931-199403	chrIX
YIL082W	AIR1	4416	205635-206507	210923-212005	chrIX
THS1	RCI37	288	212499-214703	214991-215953	chrIX
SEC28	RPN2	315	216658-217548	217863-220700	chrIX
YIL066W-A	RNR3	290	237366-237809	238099-240708	chrIX
EFM4	YRB2	45	241943-242716	242761-243744	chrIX
YIL058W	RGI2	704	246914-247198	247902-248396	chrIX
VHR1	YIL055C	129	249991-251913	252042-253925	chrIX
GPP1	RPL34B	359	255115-255867	256226-257063	chrIX
NEO1	YIL047C-A	207	261437-264892	265099-265467	chrIX
PIG2	AGE2	173	271161-272777	272950-273846	chrIX
TED1	NOT3	295	278426-279847	280142-282652	chrIX
CST6	CKA1	361	285666-287429	287790-288908	chrIX
YIL030W-A	SSM4	147	295565-295903	296050-300009	chrIX
YIL029W-A	EMA17	723	299735-300106	300829-301257	chrIX
YIL028W	EMC5	1181	302100-302498	303679-304104	chrIX
RPL2B	VID28	268	316768-317932	318200-320965	chrIX
BAR1	YIL014C-A	1107	322342-324105	325212-325526	chrIX
MNT3	PDR11	212	326103-327995	328207-332442	chrIX
DOT5	EST3	137	334882-335529	335666-336212	chrIX
URM1	NAS2	159	342536-342835	342994-343656	chrIX
EPS1	BET1	149	345692-347797	347946-348505	chrIX
CMI7	INP51	81	350301-350510	350591-353431	chrIX
YIL001W	SGN1	662	353940-355481	356143-356895	chrIX
IST3	PAN1	131	364889-365335	365466-369908	chrIX
EGH1	PRI1	79	370704-372998	373077-374306	chrIX
DSN1	STS1	126	375431-377161	377287-378246	chrIX
SQT1	GAT4	238	378486-379781	380019-380384	chrIX
YIR016W	MET28	131	382628-383425	383556-384119	chrIX
YAP5	YIR018C-A	218	384609-385346	385564-385701	chrIX
YIR020W-A	YIR020C-B	2056	394917-395159	397215-397949	chrIX
MND2	YVH1	108	403659-404765	404873-405967	chrIX
DAL2	DCG1	198	410807-411838	412036-412770	chrIX
MGA2	LYS1	150	416124-419465	419615-420736	chrIX
HYR1	GTT1	190	423128-423619	423809-424513	chrIX
PAU15	YIR042C	970	433929-434303	435273-435983	chrIX
YJL225W-A	PAU1	7465	829-1311	8776-9138	chrX
VTH2	IMA4	643	11475-16124	16767-18536	chrX
REE1	IMA5	612	23133-23729	24341-26086	chrX
YJL213W	OPT1	692	32163-33158	33850-36249	chrX
CBP1	NUC1	225	38005-39969	40194-41183	chrX
ECM25	ACO2	266	54379-56178	56444-58813	chrX
YJL193W	SOP4	136	71366-72574	72710-73414	chrX
RPS14B	RPS22A	299	73787-74611	74910-75302	chrX
MNN5	ATG36	180	80155-81915	82095-82976	chrX
MNN11	YJL182C	99	84068-85336	85435-85752	chrX
RBH1	ATP12	88	85660-87495	87583-88560	chrX
PFD1	ATG27	166	88787-89116	89282-90097	chrX
RPL17B	SWI3	396	90786-91657	92053-94530	chrX
KRE9	RFA3	239	95092-95922	96161-96529	chrX
CPS1	TOH1	237	97737-99467	99704-100894	chrX
QCR8	HAL5	176	106434-106718	106894-109461	chrX
FMP33	PIR5	175	117245-117787	117962-118825	chrX
HSP150	CIS3	575	120449-121690	122265-122948	chrX
YJL156W-A	SSY5	28	126604-126825	126853-128952	chrX
RPA34	SMT1	281	140437-141138	141419-142567	chrX
TIM17	IRC9	242	147101-147577	147819-148211	chrX
RPB4	YUR1	87	150961-151626	151713-152999	chrX
YJL136W-A	RPS21B	298	156169-156252	156550-157273	chrX
LCB3	DPI8	206	158188-159417	159623-159847	chrX
YJL132W	AIM23	112	161914-164166	164278-165348	chrX
YJL127W-A	MCO6	1241	180194-180310	181551-181709	chrX
NIT2	GCD14	104	184501-185424	185528-186679	chrX
ALB1	RPE1	131	189716-190243	190374-191090	chrX
YJL120W	YJL119C	227	191022-191345	191572-191895	chrX
PHO86	NCA3	394	192531-193466	193860-194873	chrX
CCT7	GZF3	393	207877-209529	209922-211577	chrX
PAM16	GSM1	1249	227327-227776	229025-230881	chrX
MEF2	GSH1	560	231301-233760	234320-236356	chrX
BCK1	KHA1	130	247255-251691	251821-254442	chrX
SRS2	GWT1	133	257423-260947	261080-262552	chrX
ARG3	TRL1	187	268799-269815	270002-272485	chrX
EXO70	ALY2	164	272827-274698	274862-278002	chrX
IML2	ARP4	422	281185-283380	283802-285271	chrX
YJL077W-B	ICS3	521	294047-294145	294666-295061	chrX
JEM1	PSF2	103	303181-305118	305221-305862	chrX
ARG2	YJL070C	115	306132-307856	307971-310637	chrX
YJL064W	MRPL8	189	315175-315570	315759-316475	chrX
YHC3	BIT61	52	324964-326190	326242-327873	chrX
PEP8	YJL052C-A	847	335898-337037	337884-338003	chrX
CHM7	UBX6	122	345973-347325	347447-348637	chrX
YJL045W	GYP6	372	356024-357928	358300-359676	chrX
NSP1	NUP192	375	365784-368373	368748-373799	chrX
SNX4	TAD2	153	378825-380096	380249-381001	chrX
MAD2	VPS53	138	387657-388247	388385-390853	chrX
YJL028W	YJL027C	187	391311-391646	391833-392249	chrX
RRN7	APS3	420	393967-395511	395931-396592	chrX
YJL022W	BBC1	520	398109-398417	398937-402410	chrX
CCT3	MAD3	331	407558-409162	409493-411040	chrX
CYR1	SYS1	352	425157-431237	431589-432200	chrX
COX16	OST1	221	432644-433000	433221-434651	chrX
MPP10	MRX12	348	438865-440646	440994-442553	chrX
APL1	LSO1	452	445923-448025	448477-448758	chrX
MHO1	TDH2	237	452430-453446	453683-454681	chrX
MET3	SPC1	303	456239-457774	458077-458361	chrX
YJR015W	ILV3	198	462721-464253	464451-466208	chrX
YJR018W	TES1	84	466786-467148	467232-468281	chrX
YJR020W	REC107	222	468001-468333	468555-469579	chrX
CPR7	RAV1	116	491081-492262	492378-496451	chrX
RAD26	HUL4	101	497355-500612	500713-503391	chrX
YJR037W	YJR038C	225	503102-503485	503710-504072	chrX
GEF1	URB2	154	507746-510085	510239-513763	chrX
NUP85	POL32	172	514055-516289	516461-517513	chrX
TAH11	ANB1	1046	522048-523862	524908-525381	chrX
CYC1	UTR1	220	526335-526664	526884-528476	chrX
HIT1	YJR056C	2526	538772-539266	541792-542502	chrX
CDC8	APS2	20	544062-544712	544732-545175	chrX
MNN14	NTA1	158	550511-553318	553476-554849	chrX
CCT5	ARP3	207	555914-557602	557809-559158	chrX
TOR1	YAE1	191	559416-566828	567019-567444	chrX
RFC2	HAM1	102	567643-568704	568806-569399	chrX
YJR071W	NPA3	194	570405-570773	570967-572124	chrX
HOC1	CDC11	183	573981-575171	575354-576601	chrX
YJR084W	TMH11	116	583733-585004	585120-585437	chrX
BIR1	GRR1	290	587718-590582	590872-594327	chrX
BUD4	FIP1	142	598735-603078	603220-604203	chrX
JJJ3	YJR098C	255	612413-612931	613186-615156	chrX
YUH1	AIM25	65	615576-616286	616351-617334	chrX
RSM26	VPS25	123	618234-619034	619157-619765	chrX
URA8	SOD1	60	620754-622490	622550-623014	chrX
ABM1	CPA2	502	628712-629083	629585-632941	chrX
YMR1	PXP2	174	633615-635681	635855-636706	chrX
YJR112W-A	RSM7	64	637790-638168	638232-638975	chrX
STE24	ILM1	122	642007-643368	643490-644101	chrX
RPS5	YJR124C	314	651901-652578	652892-654238	chrX
YJR128W	EFM3	720	662921-663280	664000-665019	chrX
XPT1	SGM1	109	672991-673620	673729-675852	chrX
TIM8	TTI2	207	676971-677234	677441-678706	chrX
IML1	HOM6	124	684567-689321	689445-690524	chrX
YJR142W	PMT4	157	697141-698169	698326-700614	chrX
MGM101	RPS4A	336	700882-701691	702027-703068	chrX
YJR149W	DAN1	437	707160-708374	708811-709707	chrX
AAD10	THI11	303	727405-728271	728574-729596	chrX
SOR1	MPH3	891	736044-737117	738008-739816	chrX
YKL225W	PAU16	1012	451-798	1810-2181	chrXI
YKL223W	YKL222C	782	2389-2721	3503-5620	chrXI
MCH2	FRE2	1563	6107-7528	9091-11226	chrXI
COS9	SRY1	1651	14485-15708	17359-18339	chrXI
URA1	OXP1	668	25215-26159	26827-30687	chrXI
SAC1	TRP3	285	34543-36414	36699-38153	chrXI
UBA1	STE6	186	39163-42237	42423-46295	chrXI
EMC3	ADD66	51	48194-48955	49006-49809	chrXI
EAP1	TOR2	333	53704-55602	55935-63359	chrXI
MIA40	MST1	226	75821-77032	77258-78646	chrXI
HYM1	PXA2	322	84704-85903	86225-88786	chrXI
SPE1	YKL183C-A	238	96757-98157	98395-98607	chrXI
RPL17A	COY1	335	109269-110129	110464-112503	chrXI
YKL177W	LST4	806	114356-114694	115500-117986	chrXI
ZRT3	TPO5	76	118793-120304	120380-122236	chrXI
PIR3	YKL162C-A	544	144401-145378	145922-146074	chrXI
ELF1	RCN1	110	153269-153706	153816-154451	chrXI
MCR1	DBR1	160	166400-167452	167612-168829	chrXI
YKL145W-A	RPC25	793	174958-175050	175843-176481	chrXI
CTK1	HSK3	259	182958-184544	184803-185012	chrXI
YKL131W	SHE2	289	194478-194999	195288-196028	chrXI
YKL123W	SRP21	72	212043-212423	212495-212998	chrXI
OAC1	VPH2	252	217344-218318	218570-219217	chrXI
SBA1	PRR1	370	220324-220974	221344-222900	chrXI
YKL107W	YKL106C-A	77	236141-237070	237147-237266	chrXI
AAT1	SEG2	294	237536-238891	239185-242583	chrXI
HSL1	YPF1	221	248920-253476	253697-255460	chrXI
YKL100W-A	UTP11	1472	254159-254248	255720-256472	chrXI
MTC2	YKL097C	660	256770-257843	258503-258913	chrXI
MBR1	BUD2	337	264789-265808	266145-269459	chrXI
CAB3	CYT2	191	275283-276998	277189-277863	chrXI
PSG1	PSY1	207	291453-292631	292838-293221	chrXI
DPC7	YET1	262	315954-316175	316437-317057	chrXI
MNR2	YKL063C	342	317764-320673	321015-321518	chrXI
BLI1	FBA1	296	325771-326112	326408-327487	chrXI
TOA2	NUP120	322	330166-330534	330856-333969	chrXI
SFK1	YKL050C	479	341312-342373	342852-345620	chrXI
ANR2	DCW1	262	349463-351013	351275-352624	chrXI
VPS24	NFU1	241	360143-360817	361058-361828	chrXI
TTI1	IXR1	1493	375456-378572	380065-381858	chrXI
TCD2	GPX1	475	387562-388905	389380-389883	chrXI
SKA1	CDC16	172	393721-394554	394726-397248	chrXI
RAM2	MCO12	62	402568-403518	403580-403879	chrXI
SWD2	HCS1	99	404102-405091	405190-407241	chrXI
PUT3	URB1	136	408544-411483	411619-416913	chrXI
PRP40	CCE1	94	418310-420061	420155-421216	chrXI
MRT4	LAC1	343	426242-426952	427295-428551	chrXI
CAP1	SFT1	90	429302-430108	430198-430632	chrXI
RPL14A	BYE1	373	431906-432720	433093-434877	chrXI
AUR1	MRP17	312	435580-436785	437097-437492	chrXI
DID4	MET14	233	437778-438544	438777-439385	chrXI
OSH6	ECM9	72	445381-446727	446799-448036	chrXI
RSC4	FOX2	274	452201-454078	454352-457054	chrXI
PRY2	YPT52	419	463959-464948	465367-466071	chrXI
MIC60	HEL1	355	469717-471339	471694-473349	chrXI
ALY1	NTR2	190	479234-481981	482171-483139	chrXI
RQT4	DBP7	133	483419-485011	485144-487372	chrXI
RPC37	GCN3	120	487770-488618	488738-489655	chrXI
SAP190	SET3	220	494257-497358	497578-499833	chrXI
GMH1	SPO14	241	500282-501103	501344-506395	chrXI
YKR032W	YKR033C	48	506517-506831	506879-507304	chrXI
DAL80	OPI8	213	506898-507707	507920-508561	chrXI
DID2	CAF4	149	507939-508553	508702-510633	chrXI
GAP1	YKR040C	1192	515063-516871	518063-518566	chrXI
UTH1	SHB17	273	519527-520624	520897-521712	chrXI
UIP5	YKR045C	72	522015-523346	523418-523969	chrXI
HFL1	MRS4	348	530946-532202	532550-533464	chrXI
TFA2	LAS1	137	559666-560652	560789-562297	chrXI
OAF3	PAM17	161	562547-565138	565299-565892	chrXI
GPT2	BET3	179	567918-570149	570328-570909	chrXI
YKR070W	DRE2	302	573574-574632	574934-575980	chrXI
AIM29	YKR075C	151	579209-579676	579827-580750	chrXI
YKR078W	TRZ1	80	584952-586709	586789-589305	chrXI
MTD1	RPF2	149	590395-591357	591506-592540	chrXI
NUP133	DAD2	123	592825-596298	596421-596822	chrXI
PRP16	OMA1	123	599857-603072	603195-604232	chrXI
SRL3	SRP40	400	611525-612265	612665-613885	chrXI
PTR2	RPL40B	461	615730-617535	617996-618750	chrXI
PCK1	UBP11	225	631152-632801	633026-635179	chrXI
BAS1	SKG1	615	635851-638286	638901-639968	chrXI
YKR104W	VBA5	960	656836-657756	658716-660464	chrXI
YLL066W-B	YLL066C	345	5605-5775	6120-9836	chrXII
YLL065W	PAU18	1007	11726-12076	13083-13445	chrXII
MMP1	GTT2	1431	17956-19707	21138-21839	chrXII
YLL058W	JLP1	460	23569-25296	25756-26994	chrXII
YCT1	YLL054C	969	30109-31704	32673-35204	chrXII
LDB18	YBT1	75	40666-41205	41280-46265	chrXII
FPS1	ATG10	140	49938-51947	52087-52590	chrXII
GRC3	RIX7	155	68580-70478	70633-73146	chrXII
IRC19	YLL032C	169	73409-74101	74270-76747	chrXII
PAU17	SSA2	445	94747-95121	95566-97485	chrXII
SPA2	YLL020C	209	100947-105347	105556-105861	chrXII
YLL019W-A	COX19	1676	106908-107000	108676-108972	chrXII
EMC6	PUF3	427	121322-121648	122075-124714	chrXII
SOF1	PSR1	338	127523-128992	129330-130613	chrXII
DRS1	LMO1	315	131729-133987	134302-136299	chrXII
MMM1	SPO75	74	136586-137866	137940-140546	chrXII
DNM1	YLR001C	1226	147890-150163	151389-153977	chrXII
SSL1	SSK1	321	160049-161434	161755-163893	chrXII
NSE1	PAM18	175	164392-165402	165577-166083	chrXII
RLP24	TEN1	184	166537-167136	167320-167802	chrXII
LOT6	YLR012C	304	169103-169678	169982-170281	chrXII
GAT3	PPR1	504	171339-171764	172268-174982	chrXII
BRE2	PML1	58	175227-176744	176802-177416	chrXII
MEU1	POM34	86	177608-178621	178707-179606	chrXII
PSR2	YEH2	308	180288-181481	181789-183405	chrXII
IRC25	SDO1	12	183623-184162	184174-184926	chrXII
SNF7	SED5	276	194452-195174	195450-196472	chrXII
RSC58	SMF3	243	208761-210269	210512-211933	chrXII
YLR041W	NFG1	269	229377-229697	229966-230451	chrXII
RPS0B	MLO50	537	242232-243349	243886-245172	chrXII
IES3	YLR053C	147	247201-247953	248100-248426	chrXII
MNL2	SHM2	137	255306-257855	257992-259401	chrXII
PER33	SND2	96	265456-266277	266373-266918	chrXII
SPC3	PET309	90	267169-267723	267813-270710	chrXII
FYV7	MEF1	167	271008-271463	271630-273915	chrXII
LAM6	RFU1	76	278862-280943	281019-281621	chrXII
FMP25	BOS1	113	283872-285623	285736-286559	chrXII
GAL2	SRL2	458	290212-291936	292394-293572	chrXII
SMC4	CSF1	356	302243-306499	306855-315731	chrXII
GAA1	ALT1	286	316107-317951	318237-320015	chrXII
SUL2	NYV1	288	323544-326225	326513-327415	chrXII
KIN2	HRT3	198	332590-336033	336231-337265	chrXII
LCL2	SEN2	67	346585-346980	347047-348180	chrXII
REX3	YLR108C	1337	364116-365330	366667-368124	chrXII
AHP1	CCW12	386	368781-369311	369697-370098	chrXII
HOG1	AVL9	2017	371620-372927	374944-377238	chrXII
MSL5	CLF1	219	380822-382252	382471-384534	chrXII
SRN2	YPS1	336	385534-386175	386511-388220	chrXII
YLR125W	YLR126C	871	393484-393894	394765-395520	chrXII
DIP2	ZRT2	306	399657-402488	402794-404062	chrXII
SLX4	TIS11	274	413281-415527	415801-416658	chrXII
NHA1	SLS1	148	418437-421394	421542-423473	chrXII
DPH6	ACF2	291	427329-429386	429677-432016	chrXII
RMP1	SPE4	50	432168-432773	432823-433725	chrXII
YLR146W-A	SMD3	100	433870-434058	434158-434463	chrXII
PEP3	YLR149C	234	434641-437397	437631-439823	chrXII
STM1	PCD1	427	440467-441288	441715-442737	chrXII
YLR154W-F	YLR154C-G	6499	455883-456023	462522-462671	chrXII
YLR156W	YLR156C-A	22	472113-472457	472479-472610	chrXII
YLR157W-E	YLR157C-C	22	481873-482037	482059-482190	chrXII
YLR159W	YLR159C-A	22	485345-485689	485711-485842	chrXII
RRT15	MAS1	1272	490406-490594	491866-493254	chrXII
SHH4	PUS5	105	493883-494389	494494-495258	chrXII
RPS31	UPS2	173	498947-499405	499578-500270	chrXII
YLR171W	DPH5	138	500733-501122	501260-502162	chrXII
CBF5	RFX1	212	506134-507585	507797-510232	chrXII
YLR177W	TFS1	222	511054-512940	513162-513821	chrXII
SAM1	VTA1	268	515262-516410	516678-517670	chrXII
SWI6	TOS4	192	517940-520351	520543-522012	chrXII
MDL1	ATG26	410	528300-530387	530797-534393	chrXII
PEX13	HCR1	360	537272-538432	538792-539589	chrXII
YKE2	COQ9	155	549012-549356	549511-550293	chrXII
QRI5	HMX1	119	552270-552605	552724-553677	chrXII
SEC13	PNP1	353	559551-560444	560797-561732	chrXII
CLB4	ATG38	402	562008-563390	563792-564531	chrXII
FRE1	CDC123	149	568567-570627	570776-571858	chrXII
YLR217W	COA4	234	572909-573232	573466-573918	chrXII
CCC1	RSA3	569	576825-577793	578362-579024	chrXII
UCC1	YLR225C	122	586464-587573	587695-588918	chrXII
BUR2	ADY4	21	589354-590541	590562-592043	chrXII
YLR230W	BNA5	879	604574-604879	605758-607119	chrXII
YLR232W	EST1	248	606830-607177	607425-609524	chrXII
FAR10	LIP2	141	614755-616191	616332-617318	chrXII
CSC1	ARV1	97	620473-622821	622918-623883	chrXII
GPN3	MAP1	147	624203-625021	625168-626331	chrXII
ERF2	IRC20	487	627118-628197	628684-633354	chrXII
MCP2	NDL1	68	642627-644336	644404-644973	chrXII
GSY2	HSP60	451	660716-662833	663284-665002	chrXII
LCB5	VPS63	330	665844-667907	668237-668563	chrXII
RPS28B	YLR264C-A	494	673131-673334	673828-673944	chrXII
SEC22	YLR269C	22	680200-680844	680866-681216	chrXII
CMG1	YCS4	111	682737-683561	683672-687202	chrXII
SMD2	DBP9	246	694378-694800	695046-696830	chrXII
YLR283W	ECI1	68	705186-706130	706198-707040	chrXII
NNT1	YLR285C-A	23	707360-708145	708168-708338	chrXII
YLR286W-A	YLR287C	2295	708562-708696	710991-712058	chrXII
GUF1	COQ11	119	715089-717026	717145-717978	chrXII
YLR297W	YHC1	288	724044-724433	724721-725416	chrXII
HRI1	YLR302C	632	730825-731559	732191-732553	chrXII
MET17	ACO1	1336	732542-733876	735212-737548	chrXII
CDA1	DPA10	323	745620-746525	746848-747111	chrXII
CDA2	IMH1	159	747937-748875	749034-751769	chrXII
MRPL15	SPH1	509	759480-760241	760750-762342	chrXII
EST2	BUD6	122	766542-769196	769318-771684	chrXII
MMS22	SFH1	280	771940-776304	776584-777864	chrXII
VPS65	CWC24	231	777628-777942	778173-778952	chrXII
PEX30	RPL38	357	779215-780786	781143-781379	chrXII
YLR326W	TMA10	231	782174-782896	783127-783387	chrXII
CHS5	JIP3	990	787664-789679	790669-791046	chrXII
MID2	RPS25B	3767	790676-791806	795573-796335	chrXII
NUP2	SGD1	105	797430-799592	799697-802396	chrXII
OPI9	YLR339C	581	804346-805203	805784-806335	chrXII
YLR345W	CIS1	247	820511-822040	822287-822592	chrXII
YLR347W-A	DIC1	2048	824789-824929	826977-827873	chrXII
ORM2	NIT3	109	828730-829380	829489-830364	chrXII
BUD8	TAL1	187	834352-836163	836350-837357	chrXII
STE11	NMD4	476	849866-852019	852495-853151	chrXII
SSQ1	ARC18	193	859552-861525	861718-862254	chrXII
ELO3	VID22	271	867354-868391	868662-871367	chrXII
STP3	PSY3	98	871697-872728	872826-873554	chrXII
CTF3	NAM2	143	879723-881924	882067-884751	chrXII
SMC6	IKI3	219	885288-888632	888851-892900	chrXII
VAC14	REH1	104	893628-896270	896374-897672	chrXII
RPS29A	STE23	756	898158-898821	899577-902660	chrXII
CCW14	ART10	309	903724-904440	904749-906305	chrXII
CST9	COX8	331	907950-909398	909729-909965	chrXII
DUS4	RPL31B	173	929789-930892	931065-931755	chrXII
YLR407W	BLS1	232	932967-933653	933885-934253	chrXII
BER1	YLR412C-A	1075	948368-949192	950267-950473	chrXII
INA1	PUN1	170	951156-953183	953353-954144	chrXII
VPS36	CDC73	204	955010-956710	956914-958095	chrXII
URA4	RPN13	211	963785-964879	965090-965560	chrXII
DCK1	ATG17	222	965897-971695	971917-973170	chrXII
MAG2	YLR428C	177	988428-990440	990617-990961	chrXII
SEN1	ATG23	213	993434-1000129	1000342-1001703	chrXII
IMD3	CNA1	219	1002557-1004128	1004347-1006008	chrXII
TSR2	ECM30	426	1006378-1006995	1007421-1011245	chrXII
CAR2	LSM3	134	1012501-1013775	1013909-1014178	chrXII
MRPL4	SEC39	118	1014491-1015450	1015568-1017697	chrXII
YLR446W	VMA6	341	1025214-1026515	1026856-1027893	chrXII
LEU3	SST2	517	1036093-1038753	1039270-1041366	chrXII
YLR456W	NBP1	128	1055070-1055684	1055812-1056771	chrXII
GAB1	YLR460C	1239	1057334-1058518	1059757-1060887	chrXII
YML131W	ERO1	188	10198-11295	11483-13174	chrXIII
RSC9	ERG13	251	17064-18809	19060-20535	chrXIII
GTR1	NDI1	404	26930-27862	28266-29807	chrXIII
ATR1	VAN1	363	38196-39824	40187-41794	chrXIII
BUL2	COQ5	327	46942-49704	50031-50954	chrXIII
YML108W	PML39	155	54793-55110	55265-56269	chrXIII
URA5	SEC65	413	56773-57453	57866-58687	chrXIII
TAF13	VPS9	565	77267-77770	78335-79690	chrXIII
UTP14	PRE8	198	83090-85789	85987-86739	chrXIII
UFO1	AIM33	190	92235-94241	94431-95369	chrXIII
YML082W	ATP18	172	101862-103811	103983-104162	chrXIII
BET5	WAR1	169	111865-112344	112513-115347	chrXIII
ITT1	ERV41	119	137550-138944	139063-140214	chrXIII
ORC1	TEM1	185	142210-144954	145139-145876	chrXIII
RPS1B	MFT1	256	146482-147249	147505-148683	chrXIII
OGG1	NTE1	218	151871-153001	153219-158258	chrXIII
SML1	YML057C-A	326	159383-159697	160023-160412	chrXIII
CMP2	IMD4	200	160180-161994	162194-164176	chrXIII
SPC2	CYB2	207	164790-165326	165533-167308	chrXIII
AIM32	RSE1	146	173139-174074	174220-178305	chrXIII
PRP39	RRN11	6881	181474-183363	190244-191767	chrXIII
CAT2	VPS71	113	192788-194800	194913-195755	chrXIII
CGI121	AMD1	135	205642-206293	206428-208860	chrXIII
SRC1	RAD52	360	209525-212155	212515-213930	chrXIII
YOX1	RPS18B	424	221406-222563	222987-223828	chrXIII
RPS17A	NSE5	297	225889-226697	226994-228664	chrXIII
APT1	UNG1	234	228937-229500	229734-230813	chrXIII
OST6	YML018C	316	233457-234455	234771-235952	chrXIII
PSP2	PPZ1	727	236588-238731	239458-241536	chrXIII
ERV25	RAD33	144	246116-246751	246895-247428	chrXIII
YAP1	GIS4	292	253848-255800	256092-258416	chrXIII
TRM12	GLO1	96	260221-261609	261705-262685	chrXIII
YPT7	CDC5	1219	267174-267800	269019-271136	chrXIII
TAF4	PLB2	350	276045-277211	277561-279681	chrXIII
YMR007W	PLB1	250	279960-280340	280590-282584	chrXIII
CLU1	SEC59	212	291134-294967	295179-296738	chrXIII
BUD22	ERG5	442	298868-300427	300869-302485	chrXIII
FMS1	MAC1	262	315377-316903	317165-318418	chrXIII
UBC7	MSS1	260	318680-319177	319437-321017	chrXIII
CSI1	PEX12	49	323300-324187	324236-325435	chrXIII
TAP42	FAR8	78	327482-328582	328660-330231	chrXIII
RSF1	EIS1	289	330793-331923	332212-334743	chrXIII
ARP9	RCH1	141	337788-339277	339418-340722	chrXIII
IMP2	MIH1	181	341142-341675	341856-343520	chrXIII
YET2	ARA2	103	350381-350863	350966-351973	chrXIII
YMR046W-A	NUP116	534	362702-362830	363364-366705	chrXIII
CSM3	ERB1	160	366981-367934	368094-370517	chrXIII
STV1	BUB2	126	383303-385975	386101-387021	chrXIII
SEN15	SAM37	47	391099-391485	391532-392515	chrXIII
RNA14	ARG7	266	392755-394788	395054-396379	chrXIII
SOV1	UBX4	86	401541-404237	404323-405573	chrXIII
MOT3	TVP18	136	409154-410626	410762-411265	chrXIII
ABF2	IRC21	148	411569-412120	412268-412873	chrXIII
SEC14	NAM7	653	424989-426059	426712-429627	chrXIII
PDL32	VBA1	33	442527-443381	443414-445102	chrXIII
YMR090W	NPL6	130	449245-449928	450058-451365	chrXIII
CTF13	SNO1	24	455825-457261	457285-457959	chrXIII
SNZ1	MTG1	123	458408-459301	459424-460527	chrXIII
MUB1	SRT1	283	466300-468162	468445-469476	chrXIII
YMR105W-A	YKU80	43	478064-478258	478301-480190	chrXIII
MYO5	HFD1	148	486587-490246	490394-491992	chrXIII
FOL3	YMR114C	61	494999-496282	496343-497449	chrXIII
MGR3	ASC1	247	497704-499209	499456-500688	chrXIII
YMR119W-A	ADE17	132	506996-507370	507502-509280	chrXIII
STO1	DLT1	315	517539-520446	520761-521789	chrXIII
DPI35	RRB1	136	532119-533027	533163-534698	chrXIII
ERG29	GID8	138	537838-538551	538689-540056	chrXIII
GAT2	PSO2	97	541199-542881	542978-544963	chrXIII
SIP5	YMR141C	553	547714-549183	549736-550044	chrXIII
FDO1	NDE1	403	553362-554390	554793-556475	chrXIII
SWP1	IMP1	100	560996-561856	561956-562528	chrXIII
YMR155W	TPP1	106	568551-570194	570300-571016	chrXIII
MRPS8	YMR158C-A	479	572248-572715	573194-573331	chrXIII
HLJ1	DNF3	559	577718-578392	578951-583921	chrXIII
MLH1	CEP3	137	594886-597195	597332-599158	chrXIII
YMR173W-A	PAI3	78	608897-610081	610159-610365	chrXIII
SPT21	CTL1	117	619858-622134	622251-623213	chrXIII
MIN3	SSO2	1024	625811-625897	626921-627808	chrXIII
HSC82	YMR187C	217	632355-634472	634689-635984	chrXIII
GCV2	SGS1	311	637500-640604	640915-645258	chrXIII
MRPL24	YMR193C-A	260	650036-650812	651072-651458	chrXIII
RPL36A	CMC4	684	651145-651910	652594-652887	chrXIII
YMR196W	VTI1	203	655076-658342	658545-659198	chrXIII
ROT1	RAD14	323	664752-665522	665845-667044	chrXIII
TOM40	INP1	408	668492-669655	670063-671325	chrXIII
YMR206W	HFA1	356	675896-676837	677193-683564	chrXIII
ERG12	YMR209C	113	684467-685798	685911-687284	chrXIII
DML1	EFR3	185	689083-690510	690695-693043	chrXIII
GAS3	SKY1	441	696796-698370	698811-701039	chrXIII
GUA1	TRS130	212	701790-703367	703579-706887	chrXIII
ERG8	FMP42	260	712316-713671	713931-715445	chrXIII
UBP8	MRE11	445	716715-718130	718575-720653	chrXIII
MTF1	RRP5	283	724626-725651	725934-731123	chrXIII
RNH1	RNA1	200	740266-741312	741512-742735	chrXIII
DFG5	RNT1	533	746353-747729	748262-749677	chrXIII
YHM2	RPL20A	320	751961-752905	753225-754220	chrXIII
YMR242W-A	ZRC1	452	754297-754386	754838-756166	chrXIII
YMR244W	COA6	200	757250-758317	758517-758831	chrXIII
FAA4	RKR1	1460	759807-761891	763351-768039	chrXIII
HOR7	MLO1	384	774752-774931	775315-775719	chrXIII
GFD1	COX7	378	778001-778567	778945-779127	chrXIII
CUE1	YMR265C	124	795805-796416	796540-797925	chrXIII
PPA2	PRP24	184	801772-802704	802888-804222	chrXIII
TMA23	RRN9	235	804456-805091	805326-806423	chrXIII
YMR272W-B	ZDS1	37	811089-811196	811233-813980	chrXIII
PRM15	ATR2	98	822763-824631	824729-826351	chrXIII
GPI12	AEP2	103	832339-833253	833356-835098	chrXIII
YKU70	NGL2	149	838187-839995	840144-841691	chrXIII
MRPL33	DSS1	234	841942-842202	842436-845345	chrXIII
ABZ2	HAS1	265	848685-849809	850074-851591	chrXIII
GOT1	HER2	106	854795-855293	855399-856793	chrXIII
LIP1	DYN3	141	863819-864271	864412-865350	chrXIII
UBP15	YMR304C-A	101	874987-878679	878780-879130	chrXIII
ELP6	TGL3	153	898405-899226	899379-901307	chrXIII
YMR317W	ADH6	275	907364-910786	911061-912143	chrXIII
YMR320W	YMR321C	528	916746-917051	917579-917896	chrXIII
ERR3	YMR324C	801	920088-921401	922202-922444	chrXIII
PAU19	YMR326C	479	922641-923015	923494-923802	chrXIII
DDI3	SNO2	79	11452-12129	12208-12876	chrXIV
THI12	AAD14	264	14832-15854	16118-17248	chrXIV
EGT2	PFA3	164	24048-27173	27337-28347	chrXIV
LEM3	KRE1	106	31944-33188	33294-34235	chrXIV
PFS2	PHA2	55	40619-42016	42071-43075	chrXIV
DAL82	EMW1	94	44447-45214	45308-48022	chrXIV
RFA2	SKP2	181	48287-49216	49397-51688	chrXIV
STB1	KRI1	198	52662-53924	54122-55897	chrXIV
MRPS18	BXI1	90	58155-58808	58898-59791	chrXIV
YNL303W	RPS19B	101	61510-61857	61958-62943	chrXIV
CLA4	MON2	230	68915-71443	71673-76583	chrXIV
MRX6	RIM21	139	76946-78520	78659-80260	chrXIV
PUS4	MID1	152	82806-84017	84169-85815	chrXIV
YNL285W	MRPL10	6590	96173-96544	103134-104102	chrXIV
HCH1	ERG24	167	108467-108928	109095-110411	chrXIV
BOR1	GOR1	120	119268-120998	121118-122170	chrXIV
TOF1	SEC2	206	122883-126599	126805-129084	chrXIV
ORC5	LTO1	320	155100-156539	156859-157455	chrXIV
FOL1	GIS2	232	164623-167097	167329-167790	chrXIV
TEX1	MRPL17	155	170018-171286	171441-172286	chrXIV
RAD50	MPA43	46	175410-179348	179394-181022	chrXIV
ATG2	ZWF1	324	191324-196102	196426-197943	chrXIV
CSL4	PDR16	186	214923-215801	215987-217042	chrXIV
YNL226W	CNM67	75	222239-222649	222724-224469	chrXIV
SSU72	POP1	1354	229094-229714	231068-233695	chrXIV
ADE12	ALG9	282	234413-235714	235996-237663	chrXIV
PEX17	RRG9	244	245617-246216	246460-247104	chrXIV
VID27	MRX7	246	247461-249809	250055-250315	chrXIV
RIO2	RTT106	158	255353-256630	256788-258155	chrXIV
SPS19	PSY2	171	259578-260456	260627-263203	chrXIV
UBP10	MRPL19	317	289498-291876	292193-292669	chrXIV
PBR1	RHO5	96	298335-299558	299654-300649	chrXIV
RPS3	MRPL22	284	302680-303402	303686-304615	chrXIV
YNL174W	MDG1	311	308074-308646	308957-310057	chrXIV
YNL165W	IBD2	213	323832-325052	325265-326320	chrXIV
YGP1	ASI2	869	336545-337609	338478-339347	chrXIV
IGO1	NSG2	211	340352-340858	341069-341968	chrXIV
CUZ1	YCK2	296	342516-343340	343636-345276	chrXIV
INN1	RPC31	224	346313-347542	347766-348521	chrXIV
LSM7	YNL146C-A	3	350940-351383	351386-351580	chrXIV
MFA2	YNL144C	290	352414-352530	352820-355042	chrXIV
YNL144W-A	YNL143C	3650	353061-353144	356794-357186	chrXIV
AAH1	YNL140C	278	359596-360639	360917-361486	chrXIV
SRV2	NAM9	274	366741-368321	368595-370055	chrXIV
EAF7	FPR1	237	370368-371645	371882-372226	chrXIV
TOM22	CPT1	333	378767-379225	379558-380831	chrXIV
SPC98	ESBP6	379	387227-389767	390146-392167	chrXIV
NMA111	YNL122C	345	394685-397678	398023-398370	chrXIV
NCS2	DCP2	131	401040-402521	402652-405564	chrXIV
DMA2	YNL115C	210	408341-409909	410119-412053	chrXIV
DBP2	CYB5	659	413639-416281	416940-417302	chrXIV
YAF9	INP52	166	420098-420778	420944-424495	chrXIV
RRT16	LEU4	312	424155-424583	424895-426754	chrXIV
MIC27	OCA1	250	437613-438317	438567-439283	chrXIV
YNL097W-A	RPS7B	1812	441431-441586	443398-444315	chrXIV
MKT1	END3	430	467131-469623	470053-471102	chrXIV
PMS1	SWS2	176	473391-476012	476188-476619	chrXIV
IMP4	MLF3	287	485607-486479	486766-488124	chrXIV
TOM7	RPL16B	408	493366-493548	493956-495001	chrXIV
AQR1	YDJ1	384	503724-505484	505868-507097	chrXIV
MTQ1	GCD10	74	507758-508702	508776-510212	chrXIV
NOP2	ARP5	272	510540-512396	512668-514935	chrXIV
OCA2	POR1	152	517249-517842	517994-518845	chrXIV
COG5	YNL050C	209	532659-533870	534079-534982	chrXIV
ALG11	SLM2	92	538173-539819	539911-541881	chrXIV
BOP3	COG6	178	548100-549290	549468-551987	chrXIV
GPI15	IDH1	137	557020-557783	557920-559002	chrXIV
NCE103	YNL035C	8043	559814-560479	568522-569691	chrXIV
SIW14	HHT2	289	574506-575351	575640-576050	chrXIV
HHF2	KTR5	167	576727-577038	577205-578773	chrXIV
SAM50	SSN8	946	581920-583374	584320-585291	chrXIV
HDA1	ARK1	276	593227-595347	595623-597539	chrXIV
SPO1	YNL011C	171	609686-611665	611836-613170	chrXIV
IDP3	ASI3	128	614821-616083	616211-618241	chrXIV
LST8	MRP7	335	620067-620978	621313-622428	chrXIV
HRB1	PET8	354	622915-624621	624975-625829	chrXIV
DOM34	CIT1	1006	627456-628616	629622-631061	chrXIV
YNR001W-A	ATO2	1527	631263-631481	633008-633856	chrXIV
SWM2	YNR005C	548	635943-636383	636931-637335	chrXIV
VPS27	ATG3	328	636986-638854	639182-640114	chrXIV
CSE2	PRP2	127	643744-644193	644320-646950	chrXIV
URK1	PHO91	91	647432-648937	649028-651712	chrXIV
SMM1	ACC1	132	653387-654541	654673-661374	chrXIV
ARE2	ATP23	143	665339-667267	667410-668222	chrXIV
YNR021W	MRPL50	183	668377-669591	669774-670193	chrXIV
CPR8	YNR029C	96	676177-677103	677199-678488	chrXIV
ALG12	SSK2	240	678799-680454	680694-685433	chrXIV
PPG1	HUB1	127	686010-687116	687243-687464	chrXIV
EGO4	ARC35	162	692561-692857	693019-694047	chrXIV
DBP6	ZRG17	130	695595-697484	697614-699431	chrXIV
MRX15	COQ2	81	699690-700460	700541-701659	chrXIV
YNR048W	MSO1	212	711630-712811	713023-713655	chrXIV
FRE4	YNR061C	771	739951-742110	742881-743540	chrXIV
PUL4	YNR064C	370	746943-748766	749136-750008	chrXIV
PDR18	YNR071C	1064	765375-769376	770440-771468	chrXIV
HXT17	MAN2	441	772657-774351	774792-776300	chrXIV
COS10	YNR075C-A	471	779916-781040	781511-781603	chrXIV
PAU6	YNR077C	1007	781918-782280	783287-783541	chrXIV
YOL166W-A	YOL166C	260	585-740	1000-1338	chrXV
YOL162W	PAU20	783	10119-10766	11549-11911	chrXV
YOL160W	YOL159C-A	579	14313-14654	15233-15505	chrXV
YOL155W-A	HPF1	1485	27084-27218	28703-31606	chrXV
DCP1	SPT20	127	44938-45633	45760-47574	chrXV
PSF3	CTR9	107	48864-49448	49555-52788	chrXV
NOP8	RIB4	43	53098-54552	54595-55104	chrXV
ARG8	CDC33	353	58759-60030	60383-61024	chrXV
BSC6	PFK27	447	65621-67114	67561-68754	chrXV
VPS68	YGK3	238	77560-78114	78352-79479	chrXV
RPL25	MDH2	597	80348-81190	81787-82920	chrXV
TRM13	TRM11	192	83834-85264	85456-86757	chrXV
HRP1	SMF1	244	87844-89448	89692-91419	chrXV
PAP2	PTH4	88	101475-103229	103317-103925	chrXV
MSB4	MDY2	70	106710-108188	108258-108896	chrXV
ZEO1	INO4	793	110297-110638	111431-111886	chrXV
YOL106W	WSC3	559	113226-113579	114138-115808	chrXV
ITR2	TPT1	167	124001-125830	125997-126689	chrXV
YOL097W-A	WRS1	122	136220-136405	136527-137825	chrXV
MSH2	HAL9	122	147382-150276	150398-153490	chrXV
MHF1	ADH1	103	159173-159445	159548-160594	chrXV
IRA2	REX4	249	171070-180309	180558-181427	chrXV
ATP19	BRX1	204	185438-185644	185848-186723	chrXV
MDM20	YOL075C	244	187024-189414	189658-193542	chrXV
SDH5	NBA1	225	196507-196995	197220-198725	chrXV
NUF2	HST1	71	198942-200297	200368-201879	chrXV
PRS5	MAM3	283	212244-213734	214017-216137	chrXV
GPM3	THI20	241	223268-224179	224420-226075	chrXV
AIM39	DDR2	298	230085-231272	231570-231755	chrXV
GSH2	RRT8	110	238619-240094	240204-241310	chrXV
PEX15	NTG2	91	247150-248301	248392-249534	chrXV
NGL1	NOP12	351	249825-250916	251267-252646	chrXV
RPP2A	YOL038C-A	309	254297-254617	254926-255021	chrXV
PRE6	YOL037C	565	255337-256101	256666-257019	chrXV
OPI10	SIL1	95	265429-266169	266264-267529	chrXV
GAS5	YOL029C	174	268187-269641	269815-270420	chrXV
IFM1	TSR4	186	278056-280086	280272-281498	chrXV
YOL019W	TLG2	328	288898-290553	290881-292074	chrXV
ESC8	CMK2	104	292529-294673	294777-296120	chrXV
YOL013W-A	HRD1	142	301047-301238	301380-303035	chrXV
RCL1	MDM12	283	307938-309041	309324-310139	chrXV
COQ10	CSI2	407	310312-310935	311342-312367	chrXV
SIN3	PFA4	310	316938-321548	321858-322994	chrXV
UTP23	DNL4	153	333592-334356	334509-337343	chrXV
TIR4	TIR2	397	344335-345798	346195-346950	chrXV
YOR015W	ERP4	109	359993-360352	360461-361084	chrXV
YOR019W	HSP10	205	368127-370319	370524-370844	chrXV
MCO10	SFM1	841	371685-371957	372798-373439	chrXV
STI1	CIN5	711	381053-382822	383533-384420	chrXV
DFG16	HMS1	1087	386825-388684	389771-391075	chrXV
YOR032W-A	EXO1	40	392176-392376	392416-394524	chrXV
CYC2	HIR2	106	401555-402655	402761-405388	chrXV
GLO4	YOR041C	437	407064-407921	408358-408789	chrXV
TOM6	DBP5	422	413852-414037	414459-415907	chrXV
YOR055W	NOB1	335	429478-429912	430247-431626	chrXV
SGT1	ASE1	315	432186-433373	433688-436345	chrXV
CKA2	YOR062C	172	441534-442553	442725-443531	chrXV
RPL3	YNG1	230	444686-445849	446079-446738	chrXV
MSA1	ALG8	404	449436-451325	451729-453462	chrXV
SGO1	CDC21	132	464771-466543	466675-467589	chrXV
UFE1	SKI7	125	468212-469252	469377-471620	chrXV
BUD21	ATX2	106	472725-473369	473475-474416	chrXV
DIA2	TGL5	147	474594-476792	476939-479188	chrXV
OST3	TCB1	134	482033-483085	483219-486779	chrXV
YVC1	VPS21	462	487707-489734	490196-490828	chrXV
ECM3	CMR2	538	495127-496968	497506-502452	chrXV
ARF3	RKI1	206	502795-503346	503552-504328	chrXV
RPS7A	YOR097C	211	505794-506767	506978-507505	chrXV
KTR1	CRC1	289	511825-513006	513295-514278	chrXV
DPI34	TRS33	205	537570-538454	538659-539465	chrXV
RTC5	RIO1	232	546857-548560	548792-550246	chrXV
RGA1	ADE2	283	561170-564193	564476-566191	chrXV
BAG7	IRC14	366	578564-579793	580159-580500	chrXV
IDH2	SIA1	454	580250-581359	581813-583681	chrXV
SFL1	ARP8	661	586981-589281	589942-592587	chrXV
LSC1	THI80	7337	593057-594046	601383-602342	chrXV
MDM32	SPP2	165	606607-608475	608640-609197	chrXV
MRPL23	RPB2	507	611999-612490	612997-616671	chrXV
SLP1	ISN1	136	624729-626492	626628-627980	chrXV
PET123	SME1	162	632164-633120	633282-633566	chrXV
MTR10	PNS1	182	633839-636757	636939-638558	chrXV
YOR161W-B	YOR161C-C	886	637975-638235	639121-639267	chrXV
DDP1	GET4	87	642741-643307	643394-644332	chrXV
SEY1	SWT1	230	644566-646896	647126-648502	chrXV
MED4	ALE1	214	658747-659601	659815-661674	chrXV
HEM15	MPC54	2203	662401-663582	665785-667179	chrXV
LAS17	RPS30B	351	675939-677840	678191-678793	chrXV
SER1	GSP2	900	679357-680544	681444-682106	chrXV
ULS1	THI72	1434	692475-697334	698768-700567	chrXV
PEX27	TOA1	107	710446-711576	711683-712543	chrXV
SLK19	LIP5	262	712866-715331	715593-716837	chrXV
MCA1	BFR1	269	717086-718384	718653-720065	chrXV
DED1	GEP3	839	722911-724725	725564-727234	chrXV
NOC2	RET1	364	727512-729644	730008-733457	chrXV
PTP2	NPT1	260	733925-736177	736437-737726	chrXV
RPB10	MGM1	392	738320-738532	738924-741569	chrXV
STE4	SAS5	354	742910-744181	744535-745281	chrXV
RCN2	MCT1	351	755328-756125	756476-757558	chrXV
DSC3	RPB8	165	759782-760660	760825-761265	chrXV
HER1	MCP1	304	762825-766565	766869-767777	chrXV
KIN4	RPL33B	307	775846-778248	778555-779405	chrXV
MET7	SSP2	101	786995-788641	788742-789857	chrXV
ESA1	DGA1	208	792531-793868	794076-795332	chrXV
YOR248W	APC5	359	798013-798315	798674-800731	chrXV
NAT5	SEC63	125	804377-804907	805032-807023	chrXV
OSW1	TRE2	147	807271-808107	808254-810683	chrXV
HNT3	RPT4	71	811671-812324	812395-813708	chrXV
GCD1	RPN8	195	813984-815720	815915-816931	chrXV
GPN2	YOR263C	422	817292-818335	818757-819164	chrXV
PNT1	HRK1	294	821023-822294	822588-824867	chrXV
PAC1	VPH1	183	826385-827869	828052-830574	chrXV
YTM1	TPO4	257	832813-834195	834452-836431	chrXV
MOD5	RIM20	124	837674-838960	839084-841069	chrXV
HEM4	RFM1	54	842817-843644	843698-844630	chrXV
RDL2	RRP36	208	850280-850729	850937-851839	chrXV
YOR289W	SNF2	1035	853357-854112	855147-860258	chrXV
YPK9	YOR292C	60	861175-865593	865653-866582	chrXV
RPS10A	YOR293C-A	146	867098-867852	867998-868147	chrXV
YOR296W	TIM18	672	870202-874071	874743-875321	chrXV
MUM3	MBF1	192	875599-877038	877230-877685	chrXV
ISW2	BIL1	644	884514-887876	888520-888750	chrXV
RRG7	MCH5	117	889022-889750	889867-891432	chrXV
SFG1	COT1	436	904760-905800	906236-907555	chrXV
FAA1	YOR318C	339	909343-911445	911784-912436	chrXV
HSH49	GNT1	156	912822-913463	913619-915094	chrXV
PMT3	LDB19	315	916030-918291	918606-921062	chrXV
MYO2	SNC2	289	925721-930445	930734-931081	chrXV
PDR10	SCD5	234	931803-936497	936731-939349	chrXV
YOR329W-A	MIP1	64	939348-939557	939621-943385	chrXV
VMA4	YOR333C	184	943656-944357	944541-944957	chrXV
MRS2	ALA1	225	944596-946008	946233-949109	chrXV
YOR338W	UBC11	373	956898-957989	958362-958832	chrXV
RPA190	YOR342C	685	960987-965981	966666-967625	chrXV
REV1	PYK2	157	981828-984785	984942-986462	chrXV
CIN1	MNE1	31	989789-992833	992864-994855	chrXV
TFB6	SOG2	209	997213-998244	998453-1000828	chrXV
CIR2	SNX3	108	1007221-1009116	1009224-1009712	chrXV
VTS1	PDE2	481	1011189-1012760	1013241-1014821	chrXV
RAD17	RPS12	146	1026843-1028048	1028194-1028625	chrXV
ALD4	GDH1	279	1039840-1041399	1041678-1043042	chrXV
FIT2	FIT3	449	1059531-1059992	1060441-1061055	chrXV
PHR1	YOR387C	1085	1066839-1068536	1069621-1070241	chrXV
FEX1	HSP33	634	1076784-1077911	1078545-1079258	chrXV
PAU21	YOR394C-A	990	1082718-1083212	1084202-1084369	chrXV
YPL283W-A	PAU22	5932	1426-2001	7933-8427	chrXVI
HSP32	FEX2	628	11887-12600	13228-14355	chrXVI
SAM4	PBI1	547	25087-26064	26611-28164	chrXVI
DIP5	YPL264C	414	41043-42869	43283-44344	chrXVI
FUM1	YPL261C	194	47336-48802	48996-49304	chrXVI
CUB1	APM1	286	49303-50958	51244-52671	chrXVI
YPL257W	CLN2	1117	63279-63860	64977-66614	chrXVI
HFI1	VIK1	112	69485-70951	71063-73006	chrXVI
YPL251W	ATG41	382	73625-73927	74309-74719	chrXVI
YPL250W-A	GYP5	680	75702-75989	76669-79353	chrXVI
YPL245W	HUT1	64	85586-86950	87014-88033	chrXVI
SRP68	IQG1	306	88517-90316	90622-95109	chrXVI
YAR1	YPL238C	388	99484-100086	100474-100863	chrXVI
SUI3	ENV7	255	100496-101353	101608-102702	chrXVI
RVB2	VMA11	299	103232-104647	104946-105440	chrXVI
CET1	ALG5	132	118382-120031	120163-121167	chrXVI
YPL225W	MMT2	188	126006-126446	126634-128088	chrXVI
SAR1	BMS1	211	138698-139409	139620-143171	chrXVI
CBP3	THI6	146	147416-148423	148569-150191	chrXVI
LEA1	PUS1	185	150614-151330	151515-153149	chrXVI
NIP7	SRP72	250	153495-154040	154290-156212	chrXVI
TYW1	PGC1	291	159909-162341	162632-163597	chrXVI
TPK2	AFT2	690	166256-167398	168088-169338	chrXVI
CSM4	YPL199C	79	171484-171954	172033-172755	chrXVI
RSA1	PRM3	107	181403-182548	182655-183056	chrXVI
MF%28ALPHA%291	UIP4	367	193648-194145	194512-195426	chrXVI
YPL185W	MRN1	302	195253-195648	195950-197788	chrXVI
RTC6	RTT10	119	199095-199376	199495-202536	chrXVI
CBC2	CUP9	258	212158-212784	213042-213962	chrXVI
SPT14	NIP100	79	218630-220088	220167-222773	chrXVI
MRPL40	COX10	317	223143-224036	224353-225741	chrXVI
DAP1	MEX67	267	228314-228772	229039-230838	chrXVI
MRX4	REV3	84	231217-232509	232593-237107	chrXVI
CDC60	PET20	645	246990-250262	250907-251668	chrXVI
TGS1	PRM4	152	254814-255761	255913-256767	chrXVI
RRD2	PRP46	76	265028-266104	266180-267535	chrXVI
ATG5	PPT2	100	271310-272194	272294-272815	chrXVI
PXA1	NOP53	295	273255-275867	276162-277529	chrXVI
TAF14	TBF1	396	305298-306137	306533-308221	chrXVI
SPC29	RNY1	125	316755-317516	317641-318945	chrXVI
VPS30	YPL119C-A	280	322071-323744	324024-324287	chrXVI
MRP51	IDI1	202	326628-327662	327864-328730	chrXVI
HOS3	BEM3	401	329606-331699	332100-335486	chrXVI
CAR1	GDE1	123	339944-340945	341068-344739	chrXVI
DPC25	SSE1	329	349119-349865	350194-352275	chrXVI
MSD1	FMP30	324	355700-357676	358000-359406	chrXVI
ATG21	INA17	158	361872-363362	363520-364068	chrXVI
MSY1	ERI1	99	364952-366430	366529-366735	chrXVI
PNG1	EEB1	53	366927-368018	368071-369441	chrXVI
GLR1	RPS6A	338	375502-376953	377291-378395	chrXVI
YDC1	ELP3	365	383455-384408	384773-386446	chrXVI
BRO1	SEN54	130	394038-396572	396702-398105	chrXVI
RPS9A	YPL080C	128	404950-406044	406172-406498	chrXVI
RPL21B	ATP4	471	406636-407539	408010-408744	chrXVI
YTA6	YPL073C	472	415763-418027	418499-418984	chrXVI
UBP16	YPL071C	37	418512-420011	420048-420518	chrXVI
MUK1	BTS1	99	420948-422786	422885-423892	chrXVI
VPS28	CWC27	56	427927-428655	428711-429616	chrXVI
GRX5	PDR12	811	444579-445031	445842-450377	chrXVI
LEE1	KTR6	454	455759-456664	457118-458458	chrXVI
ARL3	MNN9	220	459963-460559	460779-461966	chrXVI
SGF11	ELC1	383	465962-466261	466644-466943	chrXVI
VPS16	YPL044C	270	467260-469656	469926-470474	chrXVI
NOP4	SSN3	1044	469939-471996	473040-474707	chrXVI
MET31	EGD1	360	480535-481068	481428-481901	chrXVI
PMA2	YPL035C	878	482843-485686	486564-486911	chrXVI
YPL034W	SRL4	153	486712-487209	487362-488207	chrXVI
SMA1	SKS1	273	499665-500402	500675-502183	chrXVI
RMI1	MET12	97	503517-504242	504339-506312	chrXVI
ECM23	ULP1	649	511101-511664	512313-514178	chrXVI
SWI1	HST2	852	521014-524958	525810-526883	chrXVI
CIP1	MRPS16	293	527547-528692	528985-529350	chrXVI
RRP12	TAF3	233	529723-533409	533642-534703	chrXVI
RET3	RQC2	233	535018-535587	535820-538936	chrXVI
CHL1	TFC8	112	539385-541970	542082-543848	chrXVI
AEP3	LSP1	326	548486-550306	550632-551657	chrXVI
ULA1	SNF8	219	552020-553408	553627-554328	chrXVI
PDH1	YPR002C-A	634	558385-559935	560569-560766	chrXVI
SUT2	RPA135	227	576552-577358	577585-581196	chrXVI
YPR012W	CMR3	69	584309-584563	584632-585585	chrXVI
YPR016W-A	DSS4	130	593096-593356	593486-593917	chrXVI
ATP20	AGC1	432	599870-600217	600649-603357	chrXVI
YME1	CCL1	653	610481-612724	613377-614558	chrXVI
ATH1	YPR027C	1411	615379-619014	620425-621258	chrXVI
YOP1	APL4	267	623527-624202	624469-626967	chrXVI
SRO7	HTS1	155	634123-637224	637379-639019	chrXVI
SPO24	ERV2	295	645950-646153	646448-647038	chrXVI
TIF5	PUF2	514	648704-649921	650435-653662	chrXVI
TAH18	ATG11	84	659182-661053	661137-664673	chrXVI
MAK3	NHP6A	203	664960-665490	665693-665974	chrXVI
FCY1	YPR063C	171	677165-677641	677812-678320	chrXVI
ISA2	HOS1	164	682220-682777	682941-684353	chrXVI
NOT5	LTP1	144	690107-691789	691933-692418	chrXVI
YPR074W-A	OPY2	549	695018-695188	695737-696819	chrXVI
YPR076W	YPR077C	281	696476-696850	697131-697502	chrXVI
TEF1	GRS2	144	700594-701970	702114-703970	chrXVI
YPR084W	ASA1	155	706972-708342	708497-709828	chrXVI
YPR089W	NVJ2	215	713275-715941	716156-718468	chrXVI
YPR092W	ASR1	874	718379-718684	719558-720424	chrXVI
RDS3	SYT1	77	720637-720960	721037-724717	chrXVI
YPR097W	TMH18	332	725394-728615	728947-729528	chrXVI
SNT309	RPL11A	205	730492-731019	731224-731748	chrXVI
PRE2	FHL1	411	732349-733212	733623-736433	chrXVI
ISR1	YTH1	46	740061-741392	741438-742064	chrXVI
GLD1	RPC40	255	744689-745573	745828-746835	chrXVI
DBF20	MRD1	256	747306-749000	749256-751919	chrXVI
CLB2	CLB5	747	771653-773128	773875-775182	chrXVI
AXL1	YPR123C	470	782045-785671	786141-786575	chrXVI
YPR127W	ANT1	98	790083-791120	791218-792204	chrXVI
RPS23B	SPN1	211	794965-795767	795978-797210	chrXVI
CTF4	YPR136C	308	799234-802017	802325-802837	chrXVI
RRP9	MEP3	6904	802359-804080	810984-812453	chrXVI
TAZ1	KAR3	198	814391-815536	815734-817923	chrXVI
RRP15	NOC4	690	818323-819075	819765-821423	chrXVI
ASN1	YPR145C-A	352	822620-824338	824690-824926	chrXVI
PIN3	NCA2	351	834565-835212	835563-837413	chrXVI
KRE6	YPR159C-A	569	857583-859745	860314-860415	chrXVI
YPR160W-A	YPR160C-A	563	861934-862014	862577-862861	chrXVI
RHO1	MRP2	285	875368-875997	876282-876629	chrXVI
JIP5	YPR170C	2815	878690-880168	882983-883318	chrXVI
YPR172W	VPS4	126	885796-886398	886524-887837	chrXVI
DPB2	BET2	58	888974-891043	891101-892078	chrXVI
PRP4	HDA3	68	892332-893729	893797-895764	chrXVI
AOS1	SEC23	357	895961-897004	897361-899667	chrXVI
ATG13	PZF1	299	907218-909434	909733-911022	chrXVI
RPO26	MLC2	188	911257-911800	911988-912479	chrXVI
SKI3	RPC82	115	912664-916962	917077-919041	chrXVI
AQY1	HPA2	132	921860-922777	922909-923379	chrXVI
YPR196W	YPR197C	1110	931376-932788	933898-934461	chrXVI
SGE1	ARR1	2483	934034-935665	938148-939032	chrXVI
